# Supplementary material for: Attentional Mechanisms during the Performance of a Subsecond Timing Task
Source: PLoS One. 2016 Jul 28;11(7):e0158508. doi: 10.1371/journal.pone.0158508 (PMC4965134; doi:10.1371/journal.pone.0158508)
Supplement: S1 Table — Each Sheet corresponds to one figure. (XLS) [file pone.0158508.s002.xls]

## Sheet: Fig1_BPWF
	Timing performance on generalization test
	BISECTION POINT				WEBER FRACTION				Discrimination Inex							Curve Fitting
									Peripheral	Central	Both	Peripheral	Central	Both
Sujeto	Peripheral	Central	Both		Peripheral	Central	Both		200	200	200	800	800	800		Inerval Duration	Peripheral	Central	Both
1	442.762	395.411	550.063		0.172497	0.104584	0.0753		1	1	1	1	1	1		200	7.27273	8	4
2	413.572	435.831	540.096		0.20246	0.103341	0.105113		1	1	0.95	0.95	0.95	0.95		250	6.36364	12	6.66667
3	534.75	580.613	357.415		0.100781	0.15671	0.157095		1	1	1	0.95	0.8	1		320	10.9091	19	18
4	361.368	403.099	443.653		0.172497	0.825561	-0.179377		1	0.8	0.8	1	0.85	0.7		400	26.8687	34	27.3333
5	493.712	490.336	380.768		0.145275	0.195008	0.131977		0.95	0.95	1	0.95	0.95	1		500	56.1039	65	62.6667
6	576.188	377.825	534.871		0.264522	0.114203	0.098052		0.95	0.95	1	0.95	1	0.928571		640	82.9545	79.5556	85.3333
7	469.969	472.895	387.438		0.0795008	0.201205	0.104711		1	1	1	1	0.9	1		800	92.2727	92	90.3333
8	437.531	453.73	592.862		0.111201	0.30159	0.274222		1	1	0.95	1	0.875	0.842105
9	419.342	412.603	507.188		0.139269	0.109103	0.24637		1	1	1	1	1	0.8
10	446.601	401.825	457.562		0.166704	0.440401	0.121015		1	1	1	1	1	0.894737
11	367.181	448.37	458.669		0.075743	0.0944902	0.068321		1	0.95	1	1	0.9	1
12	402.699	384.481	485.642		0.13019	0.211492	0.176582		1	0.95	1	1	0.9	0.894737
13	502.101	552.545	407.857		0.22466	0.168129	0.144249		0.95	0.9	1	0.95	0.95	0.95
14	531.949	446.076	408.103		0.366427	0.0934326	0.775788		1	1	0.85	0.9	1	0.7
15	414.615	547.4	482.717		0.299325	0.356	0.088715		1	1	1	0.85	0.95	0.9

## Sheet: FIg2_Laten
Fixation latency to “short” and “long” levers on generalization trials
	Peropheral Group									Central Group									Both Group
	Lever 200									Lever 200									Lever 200
Sujeto	200	250	320	400	500	640	800		Sujeto	200	250	320	400	500	640	800		Sujeto	200	250	320	400	500	640	800
1	466.825	497.7	473	384	443.5		378		1	235.85	203.6	219.667	227.833	266.25		191		1	464.7	585.8	452	476.3	522.875	387
2	488.1	415.3	441.7	427.857	405		392.6		2	198.65	189.5	196.875	202.8	663	204	347		2	441.268	427.3	519.875	434.2	397	403	555
3	356.8	360.3	404.75	405.9	461.857	388.25	1121.33		3	203.075	221.556	200.778	216.111	199	200			3	572.625	725	1457.29	1126.67	402
4	5408.66	2928.89	5557.25	2545.67	8256.75	711.75	389		4	225.275	240	262.5	1428.25	199		221		4	444.969	425.833	436	534.429	618	444.6	466.417
5	427.3	424.667	435.7	427.429	401.6	416.5			5	241.421	209.2	202.2	205.429	212.333		475.5		5	1016.27	1286.5	803	1044.33	505	1002	1117
6	713.374	569.4	738.625	818.25			624.75		6	487.921	438.8	431.445	449	485	482.75			6	828.691	890.875	802.6	876	782	800.667	713.917
7	824.45	1244.44	553.667	539.571	473.2		931.5		7	473.125	490.5	434	452.778	495.333				7	1022.92	979.556	935.8	923.111	804		1042.5
8	608.75	1538.78	811.375	863.5	3831.8	406.5			8	539.325	433.8	469.5	476.286	478.5	391			8	248	230.1	376.75	921.5	181
9	2131.15	2553.33	2158.67	5075.33	1240				9	758.775	540.444	479.555	594.667	534				9	2384.32	1274.33	568.1	547.111	1455.71	2457	283
10	251.75	440.1	263.7	845.286	356		734		10	2201.65	1397.78	1140	1868	786.333	365			10	741.35	7100	1620.33	653	315
11	826.144	1310.9	872	861.5	1377.14	925.333			11	396.4	455.8	401.889	400	373.5				11	388.526	578.778	409.429	797.444	461.571	470.833	364
12	901.125	1034.3	995	834.25	944.5		859.25		12	1137.95	553.8	515.375	741.667		411.5	491.5		12	932.65	1765.3	3478	928.667	1578	1031	603
13	808.647	893.667	918.8	927.875	1037.5	590	3886.5		13	588.425	634.222	534.5	703.333	535.75		203.5		13	281.142	285.9	305.778	433.5	315.667		279.5
14	4955.9	6366.8	5031.57	4345	4914	1207	1290		14	239.163	207.7	208.444	262.429	222.333	204	3213.5		14	272.525	261.2	266.8	239	312.5
15	1827.8	2676.4	3787.89	2660.2	1602.29	2256.25			15	707.625	2143.7	559.375	1375.57	1127.4	885			15	318.475	233.2	290.625	342.5	250.8	205	324
	Lever 800									Lever 800									Lever 800
Sujeto	200	250	320	400	500	640	800		Sujeto	200	250	320	400	500	640	800		Sujeto	200	250	320	400	500	640	800
1			402.833	523.5	486	404.8	469.35		1			200	218.25	242.5	238.9	247.625		1					422	437.889	516.4
2			413	437.375	416.6	404.8	447.526		2			193.5	176.4	192	208.222	208.553		2	411		442		589.333	430.111	440.164
3	4308	340.5		350.333	365.5	289.4	492.8		3		191	350	165	249.667	213.778	227.305		3		400	1283.33	765.286	842.667	688.9	651.25
4	423	4737.17	6626.5	4189.5	1853	8912	5848.94		4	347		301.25	378.667	289	244.8	884.275		4	460	517	427	428	458.75	440.4	416.845
5			400.333	447	424.875	432.8	600.789		5	416.5			254	245.75	222.3	239.179		5			2018	1225.5	860	874.111	918.226
6	389	723.5	629	674.7	535.7	508	659.4		6			644	777	472.25	483.333	427.467		6	640.167	1007	831.8	775	857.833	850.571	873.929
7	503	395	584	559.2	461.2	534.5	578.333		7				547	498.571	505	493.825		7		1076		1134	919.667	1021.1	1021.81
8	635	570.5	423.25	1138.6	1499.25	1058.4	1001.39		8				443.333	512.375	544.556	516.675		8			281.5	219.333	273.445	237.8	347.875
9		1100	3210.5	3753.44	2820.2	1861.8	1989.5		9		395	593	549.5	1001.25	592.3	564.1		9		6102		411	2532	493.111	607.795
10			383.333	495.857	381.8	286.8	538.2		10		1714	2917	2186.67	1763.71	951.333	886.958		10			1402	1048.17	695.333	798.1	1179.83
11			745.5	811.667	961.714	626	1145.05		11	409		419	397.75	422.125	391.3	408.1		11	563	315	414.667	410	450.667	326	417.762
12	1226	807	917	882	884.7	844	891.7		12			396	997	866.6	608.625	446.075		12			1278	804	4500.71	2331.29	1090.4
13			1051	912.125	823.111	923.25	815.278		13	191	515	586.25	714	630.667	604.9	563.184		13			315	287.5	250.857	360.4	288.779
14		8104.67	6334	4376.25	3480.88	4015.2	4754.94		14			488	246.667	241.25	205.889	224.132		14				484	317.125	243.7	216.525
15		6842	5492.6	1246	2631.83	1233.75	2657.21		15			9392.5	538	215.25	1118.38	2206.5		15			308	206.5	233.4	270.445	402.518
Response latency to “short” and “long” levers on generalization trials
	Peropheral Group									Central Group									Both Group
	Lever 200									Lever 200									Lever 200
Sujeto	200	250	320	400	500	640	800		Sujeto	200	250	320	400	500	640	800		Sujeto	200	250	320	400	500	640	800
1	719.55	945.9	853.6	1114.25	776		780		1	301.3	363.3	411.445	367.5	474.25		1879		1	530.775	644.1	665.5	718	842	660
2	812.95	753.1	915.3	1023	2038		2066.2		2	691.2	648.4	723.625	966.8	1157	292	610		2	631.779	615.6	673.25	650.7	744.143	1233	783
3	1153.17	1334.2	1076.62	1848	1076.86	1631.75	826.167		3	466.875	465.333	574.667	660.667	617.143	555			3	569.225	571	1175.57	832.667	528
4	1163.83	1064.78	1304	1647.5	1672.5	1665.75	1194		4	566.425	617.3	805.833	909.25	918		1159		4	724.969	704.333	1039	710.143	618.5	898.6	825.75
5	1038.05	955.444	685.2	759.714	1202	1482			5	465.484	419.2	464.3	541.286	702.5		688.5		5	662.3	689.8	793.5	1047.83	996	1185	952
6	619.905	720.7	950.625	1395.75			542		6	529.375	492.8	451.889	510	512.5	1069.75			6	1036.85	1111.12	1159.4	1029	1053.5	712.333	795.5
7	612.3	731.111	829.889	1090.29	1018.8		859		7	550.75	802.2	620.8	686.222	981				7	508.1	524.222	479.7	457.333	677.5		729
8	614.725	575	574.875	508	1059.2	1082.5			8	526.85	611.7	673.8	667.714	552	835			8	653.15	572.5	740.5	1172.5	1084
9	628.35	597.333	630.667	604.167	530				9	607.125	546.889	649.778	833.833	901.5				9	443.325	399.222	446.4	476	444.429	43	2326
10	558.95	538	1150.7	1309.57	899.333		557		10	640.975	695.111	808.444	704.714	822.333	874			10	593.175	818.7	928.667	1051.5	477
11	778.694	654.7	645.6	790.125	819.429	723.667			11	761.3	907.1	934.556	2503	1016.5				11	462.059	618.778	459.714	645.667	565	1013.67	1843.33
12	554.775	573.3	783.111	999.75	1636.5		864.5		12	707.15	594.7	668.875	1079.17		685.5	782.333		12	628.975	795.6	662.222	1487.33	473	1028.33	964.625
13	968.632	894.778	1053.3	770	754.5	1805	1130.5		13	884.7	769.556	991.5	1130.83	934.5		1355		13	474.3	521.5	652.556	621.75	788.667		487.25
14	827.453	994.5	748.286	803.5	1007.5	1027.5	1081.5		14	792.626	784.1	896	668.714	1283.33	67	1132.75		14	485.975	484.8	474	754.333	1006
15	726.525	727.3	797.111	1427	944.286	1478.75			15	834.625	1044.6	841.875	1149.43	1428.6	2503.5			15	810.25	770.1	1400.75	914.75	1067.2	830	2117.5
	Lever 800									Lever 800									Lever 800
Sujeto	200	250	320	400	500	640	800		Sujeto	200	250	320	400	500	640	800		Sujeto	200	250	320	400	500	640	800
1				829	569.625	575.1	525.25		1			357	515.5	421.333	319.2	265.8		1					964.5	808.778	577.875
2				1311	1241.88	689.1	583.663		2			1160	902.2	808	568.111	428.405		2	964		952.5		773	711.778	657.717
3	1355.88		2102		2074.67	1007.5	674.1		3		526	309	372	542	361.222	310.363		3		601	1335.67	850.857	597.111	575.2	529.2
4	1189	1154	1144.5	997	1160.83	906.833	1249.67		4	348		1290.25	1742.17	550.556	301.5	416.75		4	1023.75	888.25	682.8	948.333	740.5	705	695.179
5	934	1265		1276.67	1405.4	698.25	704.837		5	342			513.333	472.5	502.2	283.568		5			946	912.5	808.889	562	618.963
6			787.5	677	482.3	473.4	404.2		6			837	353	459.25	403	404.151		6	1600.33	1329	1295.4	861.833	913.833	868.714	1030.45
7	602	502	605	1105.67	1000	648.7	600.181		7				1130	757.143	573.1	581.9		7		344		346	573.5	373.7	326.689
8		1032	395.5	778.75	470	506.125	622.306		8				861	974.25	400.778	481.025		8			1319.5	995	762.444	482.5	423.1
9		1069	661	618.5	579	483.6	480.6		9		443	1145	560.25	627.25	493.1	325.35		9		1323		347	454.333	950.111	394.385
10	866			894.333	998.143	588	383.125		10		838	696	1254.67	956.857	563.889	661.205		10			491	859.667	532.556	588.2	336.975
11				624.5	694	482.571	406.526		11	566		910	2170	1250.62	796.2	681.275		11	224	288	424.667	217	621	535.5	434.869
12	555		995	679.5	882.125	448.4	496.475		12			1491	1115.5	812.1	500	716.375		12			1820	2040	1428.43	1257	486.948
13	1589	801		791	718.25	914.111	652.944		13	1715	966	1519.5	1093.75	1411.83	731	675.279		13			794	854	754.714	578.5	466.456
14			1145.67	1096.83	765	853.75	865.461		14			408	773.667	1543.5	874.778	1064.05		14				887	841.5	378.3	360.5
15			1352	1179.4	913.333	915.167	861.664		15			1683.5	1496.67	1061.25	783	725.556		15			869	978	959	521.111	473.518

## Sheet: FIg3_Fixat
Duration of successive fixations on each Area of Interest during generalization trials.
Peripheral Group									Central Group									Both Group
Response to SHORT Lever
	SupLeft 1st Fixation									SupLeft 1st Fixation									SupLeft 1st Fixation
	Lever 200									Lever 200									Lever 200
Sujeto	200	250	320	400	500	640	800		Sujeto	200	250	320	400	500	640	800		Sujeto	200	250	320	400	500	640	800
1	395.621	483.02	599.565	1032.66					1									1	428.673				717.694
2	385.473	378.867	458.555	508.404	657.981				2									2							578.09
3	578.224	1305.94	1036.98	1096.58	1176.31	1594.93			3		299.106							3
4	254.055	333.07							4									4
5	99.733		289.055	219.337					5									5	380.979	249.845	283.16			582.93	233.09
6	299.742	241.57	632.905						6									6	449.7	799.48	516.31		599.55
7	229.305	578.152	1046.75	877.227			857.355		7				99.737					7
8	458.533		657.962	538.352	388.724		279.128		8									8			398.972
9	191.505	199.85		166.48	83.24				9									9
10	358.889	438.731	717.813	1634.98					10									10
11	385.81	449.55	416.25	458.09	482.91	549.54			11									11	219.343	229.189		358.861	458.609		897.218
12	291.455	374.69	532.92	607.91	899.42				12									12
13	299.84								13									13	358.831		338.968
14	399.7								14									14	398.868
15			199.84	133.23	191.78	83.3601			15	0		0		0	0	0		15		299.122	996.964	1216.19
	SupLeft 2nd Fixation									SupLeft 2nd Fixation									SupLeft 2nd Fixation
	Lever 200									Lever 200									Lever 200
Sujeto	200	250	320	400	500	640	800		Sujeto	200	250	320	400	500	640	800		Sujeto	200	250	320	400	500	640	800
1	166.6	66.49							1									1	428.673				717.694
2									2									2							578.09
3	1415.56			428.654					3									3
4									4									4
5	139.477								5									5	380.979	249.845	283.16			582.93	233.09
6									6									6	449.7	799.48	516.31		599.55
7	159.492								7									7
8	199.393						518.352		8									8			398.972
9					133.24				9									9
10									10									10
11									11									11	219.343	229.189		358.861	458.609		897.218
12									12									12
13									13									13	358.831		338.968
14									14									14	398.868
15			0			0			15	0	0	0	0	0	0	0		15		299.122	996.964	1216.19
	SupRight 1st Fixation									SupRight 1st Fixation									SupRight 1st Fixation
	Lever 200									Lever 200									Lever 200
Sujeto	200	250	320	400	500	640	800		Sujeto	200	250	320	400	500	640	800		Sujeto	200	250	320	400	500	640	800
1	369.215	474.765	666.225	1199.2					1									1	538.351				697.711
2	316.517	348.849	468.596	488.478			757.688		2									2	458.598
3	1143.1	907.088	847.332	747.658	1016.95	996.826	857.373		3				657.972					3
4	183.192								4									4
5	239.22		259.234	378.846					5									5	116.66	532.94
6	349.792	291.405	499.56	599.55					6									6	674.495
7	488.507	966.966	588.113	1146.44					7									7	316.455		133.35	616.28
8	402.127	388.882	598.083	199.538	538.37	99.747			8									8	338.986		19.991
9	197.794	458	166.54	166.48					9									9
10	531.772	408.667	538.476		498.489				10									10
11	376.84	358.175	333.065	682.76	782.77		816.13		11									11
12	366.31	308.15	707.895	632.78					12									12
13	416.35		249.85	299.83					13					239.371				13	219.24		398.745	578.21	478.488
14	216.523	116.535	124.92						14									14	518.327
15	310.84	399.62	149.85	166.47					15	0	0	0			0	0		15				398.728		0	0
	SupRight 2nd Fixation									SupRight 2nd Fixation									SupRight 2nd Fixation
	Lever 200									Lever 200									Lever 200
Sujeto	200	250	320	400	500	640	800		Sujeto	200	250	320	400	500	640	800		Sujeto	200	250	320	400	500	640	800
1	116.69								1									1
2									2									2
3	398.857			757.65		657.847			3									3
4	108.24								4									4
5				139.611					5									5	83.24
6									6									6	233.23
7			99.678	99.639					7									7
8				199.364		99.748			8									8			279.127
9	116.61		216.48	116.61					9									9
10					378.848				10									10
11		83.24	299.83						11									11
12		149.85							12									12
13			83.3701						13									13
14	166.6								14									14
15			116.49	133.34			0		15	0	0	0	0	0	0	0		15		0		0	0	0	0
	Central 1st Fixation									Central 1st Fixation									Central 1st Fixation
	Lever 200									Lever 200									Lever 200
Sujeto	200	250	320	400	500	640	800		Sujeto	200	250	320	400	500	640	800		Sujeto	200	250	320	400	500	640	800
1	237.785	366.495	456.358	532.95			358.828		1	473.512	576.219	722.187	657.921	1076.62		797.561		1	587.149	604.12	845.372	824.098	670.404	1315.8
2	401.744	412.723	480.466	418.672	239.296		1375.7		2	814.968	843.399	1016.83	1275.99	1036.75	937.085	1415.55		2	697.734	773.586	837.406	927.129	1110.82	1874.16	358.803
3	522.16	414.27	471.047	520.399	606.666	682.878	208.215		3	671.418	717.768	899.414	1067.77	1122.2	1176.44			3	741.667	719.977	1142.18	950.334	1036.84
4	204.442	158.197	149.915	74.9199	116.605	183.173	538.233		4	641.983	548.3	598.09	443.599	1435.43		1973.8		4	724.002	621.378	841.39	783.314	1116.66	681.872	1086.63
5	514.908	440.869	398.759	504.137	665.942	229.305			5	671.182	675.855	789.54	948.487	1209.55		807.47		5	194.316	251.673	227.663	441.345	249.85	283.17
6	416.274	368.077	745.31	616.165			518.423		6	616.332	723.771	775.374	917.141	1006.83	1714.63			6	466.313	462.164	486.424	574.635	707.78	921.61	803.629
7	332.94	347.844	314.063	544.008	548.278		239.19		7	484.997	428.635	472.543	609.227	870.682				7	323.103	495.908	389.678	526.717	736.952		899.265
8	362.455	189.391	356.034	187.447	426.694	199.357			8	490.487	560.252	606.124	475.697	667.981	1475.47			8	642.507	622.082	444.294	428.606	119.616
9	146.57	188.767	205.393	166.605					9	618.284	668.997	844.036	930.33	1106.59				9	146.207	199.371	169.497	242.545	151.496		139.618
10	451.081	508.418	533.886	584.832	850.702		233.07		10	276.922	327.873	369.963	492.775	279.104	279.184			10	128.58	203.403	119.556	184.429
11	347.925	346.462	368.272	461.544	447.28	227.63			11	908.66	1080.66	1094.35	2023.72	1136.51				11	297.653	376.38	239.263	463.575	452.845	506.413	764.305
12	396.803	388.082	383.078	766.133	674.55		233.157		12	677.354	725.71	428.625	564.896		179.366	1357.39		12	317.181	119.623	418.619	780.895	79.764	29.9255	124.661
13	300.474	318.289	340.509	435.113	174.85	1065.86	91.6051		13	655.385	651.387	749.488	655.093	870.22		2153.32		13	468.236	640.016	704.475	814.947	1016.79		862.293
14	156.561	133.25	122.107	133.23	99.8599	83.25	99.99		14	995.214	1028.83	1160.81	1073.82	1412.22	717.735	1276.06		14	577.236	733.743	789.534	1016.85	1136.45
15	155.256	83.23	174.97	391.375	183.133	138.69			15	991.081	1208.22	1092.57	1280.98	1395.78	1934.03			15	585.692	380.789	687.849	518.38	941.089	478.471	279.107
	Central 2nd Fixation									Central 2nd Fixation									Central 2nd Fixation
	Lever 200									Lever 200									Lever 200
Sujeto	200	250	320	400	500	640	800		Sujeto	200	250	320	400	500	640	800		Sujeto	200	250	320	400	500	640	800
1	270.687	666.165							1	159.479	418.718	99.73	169.419			598.107		1	358.881		79.75	298.984	697.833
2	362.53	303.054	325.591	490.479	1285.93		438.598		2	378.846			418.719	79.784				2	311.551	358.996	618.075	298.988			428.674
3	530.341	219.348	458.48	186.069	568.231	279.103	139.499		3									3			408.67
4	83.3601	124.975	133.23		108.3	83.24	149.85		4	129.587	578.181	448.538	528.351					4	136.224		378.788	212.664		319.066	578.223
5	237.914	206.04	245.897	295.127	790.92	727.707	857.346		5							319.004		5	173.221	124.865	177.643	133.295		116.61
6	223.714	308.113	208.165	1299.07					6	408.749	239.238							6	375.132	145.725	727.217	374.695	299.82	433.03	832.703
7	279.141	259.246	279.112		119.607		518.269		7	149.53	358.869	285.782	249.306					7	261.173	188.76	333.098	288.707	449.66		449.8
8	19.998	309.046	199.374	139.618	99.629				8	327.758	315.036	204.368	378.851	438.61				8	217.695	239.379	383.729	398.771	1096.46
9	333.08			116.61					9	326.492	458.631	588.108	119.686	199.362				9	121.311	199.421	146.241	126.241	99.662		279.11
10	99.627		638.092	318.98	279.111				10	161.639	239.211	270.267	366.883	219.37	119.62			10	19.877	119.616	458.599	179.428
11	218.322	191.545	202.267	383.072	503.818	266.53	666.16		11	538.38	518.316	657.964	518.479	677.848				11	169.469	159.588	179.501	179.367	112.993	219.349	159.488
12	161.078	416.36	116.61						12	216.43	448.666	358.902	518.381		378.863	416.32		12	169.495	99.6207	199.357	149.576	20.014	498.646	109.82
13	420.188	387.23	430.621	278.993	366.45	1165.83	433.07		13	262.858	205.43	657.915	379.722	249.84				13	231.757	348.919		996.834	259.23		458.592
14	83.2999	141.67	108.3		99.98				14			478.456		1196.42		797.604		14	388.837			219.385	119.723
15	99.99	83.24		133.22	58.365	505.08			15	119.734	289.048	259.12	249.163	887.221	1355.69			15	263.164	414.737	321.794	265.858	551.613		99.607
	Central 3rd Fixation									Central 3rd Fixation									Central 3rd Fixation
	Lever 200									Lever 200									Lever 200
Sujeto	200	250	320	400	500	640	800		Sujeto	200	250	320	400	500	640	800		Sujeto	200	250	320	400	500	640	800
1									1	199.251			159.63					1
2	279.096		259.228	378.859					2					1535.17		917.079		2
3									3	259.249								3
4	438.651				233.22		116.49		4			318.994	219.241					4
5		458.61				677.947			5									5	122.12	199.855	183.23	174.855
6									6							259.108		6	299.685	233.19					149.83
7									7	254.152	99.765		229.294					7	432.89	432.91	399.8	216.45
8	83.3599	637.97		119.638					8	285.774		272.436	199.368	119.49				8			109.675	378.838
9									9	235.567			618.105					9				119.614	139.491		478.47
10	133.24								10		132.905	269.113	159.494	99.727	99.746			10
11				183.23					11	129.629		498.478	298.972					11	169.467	219.251		468.545	458.601	807.465	348.933
12	316.46								12		99.629	328.986	485.194		299.114			12				179.369			218.855
13				233.2					13			216.48	333.2	99.99				13
14		249.76	133.23						14									14
15					83.23	199.83			15		378.715				917.204			15	99.749		452.018	119.62			159.482
	Central 4th Fixation									Central 4th Fixation									Central 4th Fixation
	Lever 200									Lever 200									Lever 200
Sujeto	200	250	320	400	500	640	800		Sujeto	200	250	320	400	500	640	800		Sujeto	200	250	320	400	500	640	800
1									1									1
2									2									2
3									3									3
4						83.3701	216.45		4									4
5									5							398.858		5	149.86			99.99
6									6	99.613			329.06					6
7									7	119.606		219.245						7	899.35			316.44
8									8	139.599								8			39.879
9									9		298.986	259.106	79.746		159.501			9					239.278		79.739
10									10	348.92			657.948					10
11									11		199.231		239.23		279.127			11	139.612			179.534			139.619
12									12									12
13									13									13
14									14									14
15	0	0	0	0	0	83.23			15					0				15		0	99.745			0
	InfLeft 1st Fixation									InfLeft 1st Fixation									InfLeft 1st Fixation
	Lever 200									Lever 200									Lever 200
Sujeto	200	250	320	400	500	640	800		Sujeto	200	250	320	400	500	640	800		Sujeto	200	250	320	400	500	640	800
1	374.778	391.445	416.385		732.77				1									1		837.353
2	259.18	289.113	348.989	498.458					2									2	139.621						99.628
3	318.986	488.469	877.339	638.023	119.614				3									3			229.303
4	149.86			166.59			133.23		4									4
5	259.21	259.239	249.231	259.245	199.358	398.721	398.738		5									5	233.23
6	328.942	299.84	299.875	399.77					6									6		83.24
7	199.377	279.103	99.739		358.857				7									7				116.48
8	383.82	378.791	299.055		578.225		99.62		8									8
9									9									9
10	309.043	338.985	897.232	398.755					10									10	159.488
11	391.012	199.85	366.37	208.375	499.66	549.65			11									11	199.309		179.437	279.116	378.866		498.48
12	410.119	341.505	349.755	549.55					12									12		39.88		159.473
13	395.548	208.16	133.27	83.3599					13									13	269.196						299.131
14			33.24				99.99		14									14
15		299.7			199.83	83.23			15	0	0	0	0	0	0	0		15	498.491	338.991	338.993	478.47	338.988	0	1674.8
	InfLeft 2nd Fixation									InfLeft 2nd Fixation									InfLeft 2nd Fixation
	Lever 200									Lever 200									Lever 200
Sujeto	200	250	320	400	500	640	800		Sujeto	200	250	320	400	500	640	800		Sujeto	200	250	320	400	500	640	800
1			199.85						1									1
2									2									2							99.627
3		797.481		139.626	179.486				3									3			139.65
4				133.23					4									4
5									5									5
6									6									6		233.1
7			199.499						7									7
8							637.956		8									8
9									9									9
10									10									10
11	99.8501		183.22	166.6					11									11
12									12									12
13			408.01						13									13
14			49.9998						14									14
15		83.24				0			15	0	0	0	0	0	0	0		15	139.614			0	0	0
	InfRight 1st Fixation									InfRight 1st Fixation									InfRight 1st Fixation
	Lever 200									Lever 200									Lever 200
Sujeto	200	250	320	400	500	640	800		Sujeto	200	250	320	400	500	640	800		Sujeto	200	250	320	400	500	640	800
1									1									1
2	264.446	458.02	499.66	899.33	916.08				2									2
3									3									3				538.18
4									4									4						1176.22
5	366.445	283.21	333.07		591.15	99.99			5									5
6									6									6	657.737	599.51	849.35				866.03
7	433.08	399.7							7									7	183.21		316.43
8	405.483	498.331	388.863		568.231				8									8
9	393.774	418.678	558.225	468.599		677.834			9									9
10	566.18	416.31		199.85					10									10
11	574.927	558.209	2970.77	996.955					11									11
12	258.317	349.685	299.89	449.69	557.795	965.6			12									12
13	416.43		916.21						13									13			219.239
14	174.878	133.23	283.155	258.16	366.33		416.38		14									14
15	133.225	316.45	216.47		249.82	83.24			15	0	0	0	0	0	0	0		15					0
	416.34	66.49		233.08	216.46	249.84	399.67
	InfRight 2nd Fixation									InfRight 2nd Fixation									InfRight 2nd Fixation
	Lever 200									Lever 200									Lever 200
Sujeto	200	250	320	400	500	640	800		Sujeto	200	250	320	400	500	640	800		Sujeto	200	250	320	400	500	640	800
1	133.235		366.41						1									1
2									2									2
3									3									3				119.749
4					1448.99	982.6			4									4
5									5									5
6		549.55							6									6		1149.04					1116.71
7	478.338				398.636				7									7	582.88
8	119.487								8									8
9									9									9
10									10									10
11			83.3599						11									11
12									12									12
13	108.202		832.83	399.7			782.77		13									13
14					116.61				14									14
15				199.96	116.61	116.61	316.45		15	0	0	0	0	0	0	0		15			0		0	0
Response to LONG lever
	SupLeft 1st Fixation									SupLeft 1st Fixation									SupLeft 1st Fixation
	Lever 800									Lever 800									Lever 800
Sujeto	200	250	320	400	500	640	800		Sujeto	200	250	320	400	500	640	800		Sujeto	200	250	320	400	500	640	800
1				616.19	516.27	874.4	478.891		1									1							737.714
2					518.488	777.592	912.141		2									2					179.492
3			1196.2		637.975	1036.81	1056.74		3									3
4			216.21	133.24	208.1	316.45	216.465		4									4
5						598.162	358.864		5									5					341.465	649.57	613.5
6				616.3	449.735	657.87	780.695		6									6	283.17		749.48		899.39	1049.19	695.267
7				578.198	468.536	189.362	822.43		7									7						349.69	566.31
8		618.088	578.215	578.224		318.918	847.32		8									8				318.989	348.918	438.599	103.019
9				99.99	516.3	183.23	749.41		9									9						1475.55
10					1435.56		558.252		10									10
11	382.95				549.55	582.91	716.146		11									11			518.483		398.733	478.486	671.246
12			466.3		566.15	674.52	859.794		12									12
13					133.36	166.6	299.83		13									13						598.224	448.594
14						99.8601	191.525		14			239.241		119.612				14
15							233.22		15	0	0		0		0	0		15		0			259.221	677.845	252.484
	SupRight 2nd Fixation									SupRight 2nd Fixation									SupRight 2nd Fixation
	Lever 800									Lever 800									Lever 800
Sujeto	200	250	320	400	500	640	800		Sujeto	200	250	320	400	500	640	800		Sujeto	200	250	320	400	500	640	800
1				99.99	133.24	100	116.61		1									1
2							916.03		2									2
3					598.093				3									3
4			149.84						4									4
5							697.839		5									5					291.47
6									6									6			183.21				915.96
7					119.633	319.003			7									7
8		159.521		378.728		39.724			8									8				498.485			588.094
9									9									9
10									10									10
11									11									11
12									12									12
13									13									13	0	0				0
14									14									14
15	0								15	0	0	0	0	0	0	0		15
	SupRight 1st Fixation									SupRight 1st Fixation									SupRight 1st Fixation
	Lever 800									Lever 800									Lever 800
Sujeto	200	250	320	400	500	640	800		Sujeto	200	250	320	400	500	640	800		Sujeto	200	250	320	400	500	640	800
1				632.93	791.205	499.73	695.391		1									1						219.367
2					767.589	588.162	790.855		2									2							817.472
3							1119.83		3							857.317		3				318.972	518.352
4	16.6299		199.84	249.7	299.69	258.085	116.61		4									4		179.508					448.656
5					598.084	448.543	725.234		5									5			233.02	449.56			438.59
6			316.41	383.16	483.005	657.885	749.47		6									6				1065.86		566.27	582.835
7					1305.88	927.14	972.009		7									7				333.07	499.54	591.225	666.145
8			458.48	438.617	558.108	638.115	294.116		8									8					119.73		99.7017
9					183.22	549.69	187.366		9									9
10				996.914	657.978	638.029	664.654		10									10
11				682.77	483.07	824.39	680.068		11									11
12				1115.83	666.145	549.55	670.372		12									12
13					349.83		241.53		13									13						618.11	996.834
14	149.86				316.58	116.48	124.925		14									14
15		0		132.98		416.305	274.773		15	0	0	0	0	0	0			15	0					378.85	398.737
	SupRight 2nd Fixation									SupRight 2nd Fixation									SupRight 2nd Fixation
	Lever 800									Lever 800									Lever 800
Sujeto	200	250	320	400	500	640	800		Sujeto	200	250	320	400	500	640	800		Sujeto	200	250	320	400	500	640	800
1						766.18	491.265		1									1
2									2									2
3									3									3					139.588
4			83.3601				166.61		4									4
5									5									5				283.09			166.61
6									6									6
7						99.613			7									7
8							179.472		8									8
9							99.99		9									9
10									10									10
11									11									11
12							216.59		12									12
13							224.905		13									13
14	183.22								14									14
15		0		116.48	0				15	0	0	0	0	0	0	0		15	0	0	0			99.759
	Central 1st Fixation									Central 1st Fixation									Central 1st Fixation
	Lever 800									Lever 800									Lever 800
Sujeto	200	250	320	400	500	640	800		Sujeto	200	250	320	400	500	640	800		Sujeto	200	250	320	400	500	640	800
1				338.68	549.624	443.022	326.467		1			677.842	837.364	930.413	961.021	895.232		1					1126.51	742.097	812.452
2				458.566	525.867	436.642	458.271		2			1485.36	1196.26	1139.33	1149.78	1204.69		2	578.276		1156.46		677.924	1245.02	1284.66
3	99.89		219.303		225.983	355.584	396.764		3		777.59	637.976	777.606	1049.97	1007.97	1113.69		3		857.333	1143.09	854.5	1005.75	885.214	1275.5
4	279.098		138.853	116.61	288.7	149.915	174.889		4	558.342		1241.16	1644.9	863.988	711.769	1017.33		4	590.691	687.879	929.082	412.06	939.562	1164.38	1124.58
5	532.93	219.375		239.269	207.345	548.268	394.157		5	548.284			923.754	971.978	1128.52	1075.91		5			166.6	224.85	326.009	235.517	293.977
6			482.99	526.276	489.262	485.798	473.441		6			618.098	757.598	971.991	907.157	1134.22		6	399.657	1249.17	193.208	643.955	360.855	501.99	369.356
7	199.343	578.215	937.107	478.501	370.86	408.721	401.144		7				319.12	777.57	737.692	752.623		7		599.67		333.06	624.575	255.367	612.12
8		239.238	199.359	184.431	195.388	538.33	280.827		8				611.436	446.103	318.996	874.277		8			618.161	581.486	595.992	522.36	708.295
9				216.47	108.233	160.973	148.204		9		697.846	1455.45	628.056	707.816	970.989	908.144		9		239.231			269.175	230.369	137.411
10	274.78			232.576	481.353	496.416	611.605		10		458.653	159.479	129.556	262.048	483.519	457.993		10				199.308	111.615	156.623	146.244
11				274.885	288.58	521.063	392.538		11	259.108		1236.06	1871.65	1517.8	1252.12	1406.11		11	199.356	538.356	325.691	618.092	551.642	328.987	302.389
12	766.14		183.09	516.385	482.949	560.693	500.05		12			986.894	877.317	926.019	904.668	1091.12		12				59.737	332.522	398.739	623.819
13		1049.25		199.84	435.134	355.315	419.165		13	1914.02	949.38	966	824.405	799.47	1005.97	1015.58		13			219.356	548.299	769.03	608.101	660.305
14			91.5499	208.15	133.175	99.8501	173.351		14			737.695	1182.95	2013.75	1521.92	1747.43		14				1136.45	1328.35	1026.81	1116.53
15			166.59	149.845	300.06	138.857	141.503		15			299.111	1495.22	1340.8	1383.68	1351.8		15			388.784	428.733	378.843	549.39	638.152
	Central 2nd Fixation									Central 2nd Fixation									Central 2nd Fixation
	Lever 800									Lever 800									Lever 800
Sujeto	200	250	320	400	500	640	800		Sujeto	200	250	320	400	500	640	800		Sujeto	200	250	320	400	500	640	800
1						324.705	237.372		1				319.126			620.021		1						611.412	265.009
2				677.912	593.173	219.35	489.919		2				59.738	508.353	239.24	189.368		2	378.843				468.55	538.479	406.722
3			1455.58		209.368	518.344	461.873		3									3				99.715		578.231	338.979
4			158.225				149.913		4			159.506	1106.51	279.169	358.904	259.224		4				219.292	325.7	318.994	346.409
5	618.075	199.357		348.935	741.65	406.759	542.16		5							159.507		5			416.33	183.23	241.47	208.225	283.727
6				258.09	255.333	866.13	295.049		6						777.578	593.157		6	599.523		216.55	433.04	305.363	524.635	430.6
7				119.623	618.096	322.98	199.39		7				159.506		179.604	322.324		7					183.225	421.081	473.758
8					488.468	159.5	458.548		8				209.308	253.464	501.311	721.733		8			139.481	877.274	239.261	363.821	189.402
9							116.607		9				119.746	139.576	405.406	291.086		9					119.501	189.455	201.374
10						219.336	149.51		10		279.101	99.733	159.494	255.862	244.246	435.491		10				139.517	159.488	119.608	179.36
11	299.83			83.0898	344.16	241.47	216.883		11				285.83	1694.82	697.856	179.415		11					99.628	608.1	309.001
12					1074.17	438.55	137.361		12	318.975		468.606	159.493	431.965	109.547	521.689		12				20.001	149.54	119.737	294.815
13				208.215	496.36	453.018	349.759		13			420.57	283.08	183.243	216.5	440.146		13			538.232	737.703	486.479	232.616	314.06
14			116.62	166.47	116.61		91.6101		14							930.493		14							917.214
15				183.09		99.8699	116.575		15			1096.57	199.218	298.992		1315.81		15			199.367	219.369	505.078	147.553	403.002
	Central 3rd Fixation									Central 3rd Fixation									Central 3rd Fixation
	Lever 800									Lever 800									Lever 800
Sujeto	200	250	320	400	500	640	800		Sujeto	200	250	320	400	500	640	800		Sujeto	200	250	320	400	500	640	800
1							498.461		1							212.705		1						308.983	169.416
2				79.747	378.725				2									2
3						458.603	83.3699		3									3				139.503			219.363
4			174.905						4			1176.32			119.684	189.399		4				458.595			99.609
5		239.23		398.737					5									5			183.11			116.62	152.648
6									6									6			116.62		116.61	158.22	233.09
7				418.705			837.464		7				139.513		79.925	109.749		7					99.8699	366.375	649.51
8							183.23		8				179.498	259.144	398.856	297.022		8			817.311		209.367	179.356
9							229.266		9				139.627	212.672		189.359		9						187.422	146.163
10							649.54		10		99.754	259.119	139.491	199.393	166.153	241.065		10				179.482
11							449.81		11				1754.53					11					119.632	259.109	232.607
12							341.455		12	159.369			1216.2	628.022	378.85	234.271		12				59.742			119.565
13						438.57	108.202		13				83.23	199.845		283.118		13						478.467	259.238
14				99.8499					14									14
15	0					99.98			15									15				149.489	827.395		179.443
	Central 4th Fixation									Central 4th Fixation									Central 4th Fixation
	Lever 800									Lever 800									Lever 800
Sujeto	200	250	320	400	500	640	800		Sujeto	200	250	320	400	500	640	800		Sujeto	200	250	320	400	500	640	800
1									1							139.477		1							159.497
2									2									2
3									3									3				478.472			99.627
4									4							269.166		4							398.735
5									5									5						499.69	266.475
6									6									6			116.72
7				458.583					7				139.606			199.374		7					433.07
8									8					358.811		99.755		8
9							83.24		9					139.565		159.5		9						239.121	99.739
10							139.623		10				298.989	152.825	179.461	239.25		10
11									11									11						119.622	109.68
12									12						249.281	229.242		12				199.372	19.949
13									13					166.48		216.59		13							119.632
14				116.61			116.61		14									14
15	0	0	0		0	0			15	0	0	0						15	0	0		179.494
	InfLeft 1st Fixation									InfLeft 1st Fixation									InfLeft 1st Fixation
	Lever 800									Lever 800									Lever 800
Sujeto	200	250	320	400	500	640	800		Sujeto	200	250	320	400	500	640	800		Sujeto	200	250	320	400	500	640	800
1				416.315	749.4	582.985	1045.11		1									1						199.49
2				558.232	348.926	657.976	775.087		2									2
3					558.353	618.075	372.196		3									3			139.495	159.499		717.72
4			316.57		83.235	83.24	266.46		4									4
5				558.242	518.357	458.472	684.544		5									5							83.3599
6				399.78	366.45	583	618.291		6						598.228			6	366.43				149.86
7						747.713	761.009		7							298.994		7
8				348.923	438.597	398.783	677.902		8									8						19.852	19.998
9							216.6		9					99.739				9						368.812	478.604
10				578.214	837.452	767.583	578.237		10									10
11					199.84	549.66	368.322		11									11	179.503						431.996
12					408.12	483.03	680.797		12									12						159.543
13					241.47	83.3601	366.43		13									13				378.866	338.839	498.406	428.67
14				149.855		83.3701	149.985		14									14
15	0	0		83.3599		233.21	208.212		15	0	0	0	0					15		0				468.548	598.101
	InfLeft 2nd Fixation									InfLeft 2nd Fixation									InfLeft 2nd Fixation
	Lever 800									Lever 800									Lever 800
Sujeto	200	250	320	400	500	640	800		Sujeto	200	250	320	400	500	640	800		Sujeto	200	250	320	400	500	640	800
1				333.08					1									1						259.219
2							179.485		2									2
3							83.3601		3									3
4					108.29				4									4
5							399.69		5									5
6					83.23				6									6	83.3599				166.48
7							99.763		7									7
8				139.482					8									8
9									9					119.631				9
10							258.26		10									10
11					299.69				11									11
12					199.85		91.545		12									12
13					83.24	316.45	116.6		13									13							139.627
14							108.26		14									14
15	0	0	0	233.21		166.59			15	0	0	0	0		0	0		15		0	0	0			119.62
	InfRight 1st Fixation									InfRight 1st Fixation									InfRight 1st Fixation
	Lever 800									Lever 800									Lever 800
Sujeto	200	250	320	400	500	640	800		Sujeto	200	250	320	400	500	640	800		Sujeto	200	250	320	400	500	640	800
1				1399.14	616.25	691.155	841.1		1									1
2									2									2
3									3									3							1036.84
4	482.93		383.06	199.97		499.65	870.268		4									4					1116.58		737.721
5									5									5
6	832.84		932.7	732.805	832.73	524.685	865.984		6									6	1082.48		216.59	483.025	566.26	1399.06	799.483
7				179.349		747.745	618.017		7									7					599.55		116.6
8	578.223				1026.77	458.585	760.175		8									8
9				383.07	399.69	441.315	321.977		9									9
10					687.852	877.208	922.116		10									10
11	366.58			216.87		249.61	601.679		11									11							119.625
12					716.13		413.518		12									12
13					133.23	366.385	270.62		13									13						119.612	1166.31
14			233.22	166.59	183.22	199.61	272.058		14									14
15		0	216.46				238.818		15	0	0	0	0	0	0	0		15
	InfRight 2nd Fixation									InfRight 2nd Fixation									InfRight 2nd Fixation
	Lever 800									Lever 800									Lever 800
Sujeto	200	250	320	400	500	640	800		Sujeto	200	250	320	400	500	640	800		Sujeto	200	250	320	400	500	640	800
1									1									1
2									2									2
3							574.645		3									3
4				566.14		349.82			4									4
5							499.55		5									5
6						383.07	418.625		6									6			832.73	949.21			799.36
7				438.748			657.963		7									7							583.01
8							641.195		8									8
9					299.7	233.22	817.571		9									9
10							349.72		10									10
11							616.27		11									11
12							674.535		12									12
13					316.46	499.68	202.61		13									13						578.222
14				99.9902	99.9902	83.23	333.035		14									14
15	0	0	0						15	0	0	0	0	0	0	0		15	0	0			0

## Sheet: FIg4_Pupil
Mean pupil diameter in successive fixations on each Area of Interest during generalization trials
Peripheral Group									Central Group									BOTH Group
Response to SHORT Lever
	SupLeft 1st Fixation									SupLeft 1st Fixation									SupLeft 1st Fixation
	Lever 200									Lever 200									Lever 200
Sujeto	200	250	320	400	500	640	800		Sujeto	200	250	320	400	500	640	800		Sujeto	200	250	320	400	500	640	800
1	2.98169	2.83072	2.75354	3.00253					1									1	2.85735				3.12058
2	3.18199	3.11882	3.21774	3.21873	3.15035				2									2							3.20989
3	3.50661	3.60322	3.35461	3.43683	3.368	3.52891			3		3.86836							3
4	2.72172	2.70194							4									4
5	3.32617		3.39941	3.24162					5									5	2.97633	2.99646	3.02037			3.07514	2.85018
6	2.72933	2.73888	2.741				3.69597		6									6	2.59781	2.71611	2.62913		2.57678
7	3.4115	3.2342	3.52476	3.46768			3.83127		7				3.79382					7
8	3.42747		3.50871	3.34533	3.38471				8									8			3.71744
9	2.4798	2.62036		2.34255	2.70398				9									9
10	3.32582	3.27592	3.43632	3.44599					10									10
11	2.27729	2.31858	2.32094	2.2674	2.3105	2.38738			11									11	3.37039	3.2858		3.27565	3.35348		3.39056
12	2.73421	2.85894	2.8195	2.82497	3.23953				12									12
13	2.40761								13									13	3.25804		3.12631
14	2.802								14									14	3.59514
15			2.93665	2.84381	2.9045	2.76615			15	0		0		0	0	0		15		3.2533	3.07053	3.28298
	SupLeft 2nd Fixation									SupLeft 2nd Fixation									SupLeft 2nd Fixation
	Lever 200									Lever 200									Lever 200
Sujeto	200	250	320	400	500	640	800		Sujeto	200	250	320	400	500	640	800		Sujeto	200	250	320	400	500	640	800
1	2.93563	2.82218							1									1
2									2									2
3	3.75602			3.65269					3									3
4									4									4
5	3.2554								5									5		3.13584	2.99883				2.90015
6									6									6
7	3.38339								7									7
8	3.31164						3.75415		8									8			3.78272
9					2.66356				9									9
10									10									10
11									11									11
12									12									12
13									13									13	0			0	0	0
14									14									14
15			0			0			15	0	0	0	0	0	0	0		15
	SupRight 1st Fixation									SupRight 1st Fixation									SupRight 1st Fixation
	Lever 200									Lever 200									Lever 200
Sujeto	200	250	320	400	500	640	800		Sujeto	200	250	320	400	500	640	800		Sujeto	200	250	320	400	500	640	800
1	2.87521	2.92956	2.81016	2.88677					1									1	3.28027				3.20973
2	3.42268	3.25162	3.12281	3.20675			3.12869		2									2	3.32996
3	3.24622	3.32366	3.17095	3.18958	3.44463	3.27164	3.21559		3				3.9464					3
4	2.81758								4									4
5	3.33551		3.2807	3.28071					5									5	3.34167	3.02611
6	2.80047	2.83787	2.87169	2.77027					6									6	2.64468
7	3.27817	3.27877	3.29527	3.43504					7									7	2.87693		2.84182	2.5631
8	3.35787	3.39796	3.30659	3.34243	3.41316	3.38592			8									8	3.912		4.16182
9	2.83562	2.52327	2.46128	2.92371					9									9
10	3.29139	3.31019	3.65546		3.35543				10									10
11	2.35092	2.34225	2.23004	2.3023	2.28343		2.43533		11									11
12	2.49559	3.14646	2.76287	2.68856					12									12
13	2.31713		2.44358	2.48025					13					3.39526				13	3.14239		3.11122	3.17303	3.22823
14	2.82322	2.91334	2.81118						14									14	3.55429
15	2.83128	2.75599	2.771	2.83663					15	0	0	0			0	0		15				2.95351		0	0
	SupRight 2nd Fixation									SupRight 2nd Fixation									SupRigh 2nd Fixation
	Lever 200									Lever 200									Lever 200
Sujeto	200	250	320	400	500	640	800		Sujeto	200	250	320	400	500	640	800		Sujeto	200	250	320	400	500	640	800
1	2.76182								1									1
2									2									2
3	3.85076			3.40491		3.30193			3									3
4	2.6968								4									4
5				3.33069					5									5	3.35791
6									6									6	2.63948
7			3.4446	3.55463					7									7
8				3.36824		3.47584			8									8			4.08598
9	2.44457		2.48498	2.7721					9									9
10					3.54986				10									10
11		2.37795	2.18117						11									11
12		2.99809							12									12
13			2.46146						13									13
14	2.92595								14									14
15			2.78421	2.86535			0		15	0	0	0	0	0	0	0		15		0		0	0	0	0
	Central 1st Fixation									Central 1st Fixation									Central 1st Fixation
	Lever 200									Lever 200									Lever 200
Sujeto	200	250	320	400	500	640	800		Sujeto	200	250	320	400	500	640	800		Sujeto	200	250	320	400	500	640	800
1	2.78701	2.89839	2.86566	2.89959			3.20551		1	3.044	3.054	3.068	3.081	3.053		3.335		1	2.93334	2.88801	2.87086	2.88212	2.97167	2.85333
2	3.3186	3.20198	3.21978	3.26514	3.37511		3.27457		2	3.497	3.494	3.517	3.487	3.461	3.31	2.758		2	3.31546	3.25536	3.33812	3.2661	3.31623	3.36127	3.2833
3	3.2327	3.44316	3.38623	3.42443	3.60942	3.46939	2.84267		3	2.7185	2.778	2.676	2.854	2.763	2.621			3	3.32673	3.3021	3.26941	3.24252	3.18455
4	2.66183	2.6512	2.77002	2.97163	2.63461	2.83584	3.46134		4	3.671	3.534	3.66	3.779	4.103		3.512		4	3.11162	3.28194	3.25233	3.17782	3.22001	3.12449	3.23968
5	3.41986	3.49355	3.44711	3.39727	3.58311	3.41035			5	2.9225	2.931	2.889	2.985	3.014		3.9095		5	3.03417	2.94019	2.89276	2.955	2.96377	2.91972
6	2.77684	2.77349	2.80245	2.82296			3.29789		6	4.019	3.927	4.019	3.975	4.044	4.008			6	2.69538	2.67791	2.70969	2.71752	2.73884	2.72077	2.73142
7	3.25564	3.21344	3.33649	3.36034	3.20152		3.57552		7	2.964	3.111	3.041	3.014	3.157				7	2.56414	2.62701	2.68793	2.74067	2.58234		2.88267
8	3.41376	3.41249	3.31955	3.43602	3.43062	3.48005			8	3.4255	3.43	3.47	3.49	3.363	3.41			8	3.96612	3.97097	3.99057	4.0602	3.87153
9	2.6688	2.63077	2.91687	2.67056					9	3.1475	3.3	3.27	3.24	3.21				9	2.6322	2.7054	2.64789	2.53284	2.70542		2.52467
10	3.42659	3.42593	3.41915	3.46434	3.44372		2.43057		10	3.503	3.408	3.347	3.349	3.422	3.418			10	3.30038	3.38037	3.16663	3.30071
11	2.28814	2.33197	2.27686	2.31751	2.32903	2.35951			11	3.169	3.092	3.179	3.15	3.192				11	3.34191	3.31467	3.37187	3.33789	3.36571	3.35027	3.50543
12	2.85053	2.92193	2.74346	2.81753	3.15059		2.34287		12	3.554	3.556	3.582	3.525		3.481	3.2275		12	3.07184	3.11203	3.18002	3.24148	3.09935	3.00995	3.16047
13	2.37227	2.32432	2.35799	2.34374	2.33282	2.35669	2.96453		13	3.144	3.139	3.121	3.033	3.076		3.424		13	3.14576	3.13407	3.10903	3.11163	3.14081		3.14072
14	2.87261	2.87499	2.90725	3.13328	2.84928	2.97846	2.71733		14	3.392	3.385	3.369	3.399	3.413	3.529	3.31		14	3.47078	3.44804	3.4406	3.49088	3.51878
15	2.78389	2.73828	2.83793	2.87623	2.82058	2.77133			15	3.442	3.441	3.531	3.533	3.583	3.963			15	3.40087	3.43836	3.28261	3.25376	3.20687	3.35432	3.54113
	Central 2nd Fixation									Central 2nd Fixation									Central 2nd Fixation
	Lever 200									Lever 200									Lever 200
Sujeto	200	250	320	400	500	640	800		Sujeto	200	250	320	400	500	640	800		Sujeto	200	250	320	400	500	640	800
1	2.79336	2.91951							1	2.91254	3.13401	3.03185	3.2914			3.45101		1	2.61067		2.99185	2.59793	3.1811
2	3.34017	3.18169	3.24982	3.28765	3.18039		3.35437		2	3.62922			3.56653	3.69431				2	3.4559	3.19525	3.39258	3.51693			3.32083
3	3.39556	3.59749	3.71252	3.57392	3.5901	3.30147	3.71769		3									3			3.48758
4	2.92065	2.68636	2.8314		2.6287	2.86166	2.97016		4	3.28008	3.61424	3.85983	3.83106					4	3.23124		3.27249	3.23604		3.07499	3.26163
5	3.51823	3.55002	3.41264	3.40786	3.6053	3.54212	3.58913		5							3.56316		5	3.0103	2.89082	2.87954	3.00184		3.37951
6	2.81311	2.85312	2.89321	2.79237					6	4.11967	3.83217							6	2.68228	2.6233	2.65912	2.75444	2.65322	2.63339	2.66744
7	3.12045	3.11086	3.29688		3.08818		3.1449		7	2.84742	3.10936	3.06365	2.89257					7	2.55003	2.59647	2.65334	2.75897	2.4771		2.88121
8	3.46154	3.49979	3.56565	3.63747	4.0403				8	3.45087	3.4267	3.46556	3.42931	3.31281				8	3.92723	3.9242	3.91798	4.08823	3.91913
9	2.69005			2.93403					9	3.33249	3.23721	3.08449	3.30394	3.42441				9	2.68243	2.62994	2.65913	2.5523	2.41303		2.54592
10	3.31602		3.46826	3.32465	3.41854				10	3.51934	3.43289	3.4431	3.37914	3.48077	3.52852			10	3.41941	3.713	3.25923	3.32094
11	2.34203	2.35597	2.32817	2.28089	2.40801	2.36451	2.37851		11	2.9531	3.3163	3.20126	3.31185	3.17118				11	3.27163	3.43465	3.31772	3.37022	3.34946	3.37781	3.40552
12	2.67436	2.95193	2.83545						12	3.41458	3.37373	3.42807	3.52873		3.53735	3.26588		12	3.10814	3.20472	3.03476	3.16268	3.03909	3.24169	3.10084
13	2.37413	2.35204	2.42025	2.36262	2.42814	2.39229	2.19403		13	3.30087	3.32621	3.29532	3.18731	3.25554				13	3.16706	3.13883		2.99912	3.26544		3.19058
14	2.84251	2.84946	2.87025		2.99332				14			3.413		3.48355		3.59792		14	3.47393			3.59845	3.67295
15	2.87886	2.58807		2.96656	2.85556	2.78144			15	3.70516	3.6525	3.9858	3.97179	3.71169	3.93278			15	3.48517	3.50758	3.47801	3.18955	3.22344		3.35541
	Central 3rd Fixation									Central 3rd Fixation									Central 3rd Fixation
	Lever 200									Lever 200									Lever 200
Sujeto	200	250	320	400	500	640	800		Sujeto	200	250	320	400	500	640	800		Sujeto	200	250	320	400	500	640	800
1									1	3.68955			3.28918					1
2	3.53132		3.425	3.25369					2					3.76412		3.47054		2
3									3	3.35189								3
4	3.71705				2.72446		3.01564		4			3.91131	3.7679					4
5		3.60498				3.65406			5									5	3.10573	2.91346	3.05552	3.08004
6									6							3.54248		6	2.70569	2.60157					2.66768
7									7	3.51304	3.19454		3.02377					7	2.82899	2.59218	2.6377	2.43856
8	2.63865	3.47828		3.58579					8	3.50006		3.55034	3.51986	3.4072				8			3.78099	4.18526
9									9	3.39504			3.39405					9				2.67813	2.45345		2.35296
10	2.44291								10		3.58026	3.30532	3.45916	3.80843	3.48566			10
11				2.53318					11	3.39299		3.19237	3.22742					11	3.2975	3.36506		3.33673	3.16798	3.225	3.39314
12	2.38554								12		3.24483	3.49314	3.53083		3.62199			12				3.30347			3.08485
13				2.42308					13			3.40564	3.26554	3.34756				13
14		2.89983	2.84774						14									14
15					2.94678	2.86126			15		3.68072				3.77431			15	3.48878		3.33832	3.36621			3.55454
	Central 4th Fixation									Central 4th Fixation									Central 4th Fixation
	Lever 200									Lever 200									Lever 200
Sujeto	200	250	320	400	500	640	800		Sujeto	200	250	320	400	500	640	800		Sujeto	200	250	320	400	500	640	800
1									1									1
2									2									2
3						2.91315	2.96335		3									3
4									4									4
5									5							3.70332		5	3.04131			3.2053
6									6	3.61957			3.15983					6
7									7	3.64033		3.74207						7	2.92569			2.50283
8									8	3.48488								8			3.77798
9									9		3.81046	3.38559	3.50243		3.52984			9					2.55639		2.26672
10									10	3.51443			3.32064					10
11									11		3.29965		3.74719		3.74362			11	3.55887			3.41953			3.45431
12									12									12
13									13									13
14						2.87801			14									14
15	0	0	0	0	0				15					0				15		0	3.29149			0
	InfLeft 1st Fixation									InfLeft 1st Fixation									InfLeft 1st Fixation
	Lever 200									Lever 200									Lever 200
Sujeto	200	250	320	400	500	640	800		Sujeto	200	250	320	400	500	640	800		Sujeto	200	250	320	400	500	640	800
1	3.06002	2.94405	2.96933		2.82233				1									1		2.9723
2	3.22707	3.0253	3.22706	3.1951					2									2	3.37984						3.32236
3	3.22081	3.46327	3.53129	3.5129	3.35212				3									3			3.31244
4	3.06932			2.75475			2.77321		4									4
5	3.33651	3.83612	3.47275	3.28284	3.68936	3.39153	3.49584		5									5	3.10166
6	2.78472	2.75979	2.94807	2.87798					6									6		2.45694
7	3.22229	3.35391	3.45395		3.29124				7									7				2.53061
8	3.46358	3.5499	3.37379		3.41179		3.33331		8									8
9									9									9
10	3.30459	3.4324	3.4714	3.34196					10									10	3.18059
11	2.16865	2.39239	2.34191	2.28147	2.40604	2.28578			11									11	3.34013		3.42548	3.21174	3.25062		3.56271
12	2.79625	2.73847	2.8345	2.7464					12									12		3.16466		3.18319
13	2.34479	2.41676	2.30642	2.33271					13									13	3.06296						3.13105
14			2.96856				2.96893		14									14
15		2.78221			2.86098	2.88126			15	0	0	0	0	0	0	0		15	3.44636	3.264	3.25756	3.31759	3.38851		3.47403
	InfLeft 2nd Fixation									InfLeft 2nd Fixation									InfLeft 2nd Fixation
	Lever 200									Lever 200									Lever 200
Sujeto	200	250	320	400	500	640	800		Sujeto	200	250	320	400	500	640	800		Sujeto	200	250	320	400	500	640	800
1			2.88919						1									1
2									2									2							3.32111
3		3.68026		3.58337	3.34535				3									3			3.18644
4				2.80084					4									4
5									5									5
6									6									6		2.48131
7			3.33675						7									7
8							3.50274		8									8
9									9									9
10									10									10
11	2.17355		2.3447	2.33895					11									11
12									12									12
13			2.32676						13									13
14			2.9539						14									14
15		2.76987				0			15	0	0	0	0	0	0	0		15	3.37359			0	0	0
	InfRight 1st Fixation									InfRight 1st Fixation									InfRight 1st Fixation
	Lever 200									Lever 200									Lever 200
Sujeto	200	250	320	400	500	640	800		Sujeto	200	250	320	400	500	640	800		Sujeto	200	250	320	400	500	640	800
1	2.81589	2.82311	2.94324	2.91162	2.87808				1									1
2									2									2
3									3									3				3.42977
4	2.77253	2.69264	2.83378		2.71313	2.87391			4									4						3.20263
5									5									5
6	2.78369	2.87983							6									6	2.69124	2.58444	2.70733				2.71974
7	3.3595	3.00805	3.34222		3.09091				7									7	2.8517		2.68166
8	3.42475	3.24119	3.15917	3.33215		3.44102			8									8
9	2.77087	2.72563		2.89838					9									9
10	3.48087	3.43405	3.76703	3.43943					10									10
11	2.30578	2.32439	2.32975	2.19142	2.34151	2.39356			11									11
12	2.85586		2.49543						12									12
13	2.3852	2.40574	2.14933	2.31665	2.45288		2.27335		13									13			3.14712
14	2.86193	2.79927	2.89261		2.91553	2.87297			14									14
15	2.78443	2.83257		2.88488	2.90855	2.92887	2.91547		15	0	0	0	0	0	0	0		15					0
	InfRight 2nd Fixation									InfRight 2nd Fixation
	Lever 200									Lever 200									InfRight 2nd Fixation
Sujeto	200	250	320	400	500	640	800		Sujeto	200	250	320	400	500	640	800			Lever 200
1	2.97424		3.04299						1									Sujeto	200	250	320	400	500	640	800
2									2									1
3									3									2
4					2.68271	2.81304			4									3				3.5749
5									5									4
6		2.80249							6									5
7	3.30075				3.41671				7									6		2.47662					2.62226
8	3.51153								8									7	2.68358
9									9									8
10									10									9
11			2.24006						11									10
12									12									11
13	2.41835		2.199	2.23492			2.25852		13									12
14					2.91766				14									13
15				2.88968	2.81787	2.8265	2.7307		15	0	0	0	0	0	0	0		14
																		15			0		0	0
Response to LONG Lever
	SupLeft 1st Fixation									SupLeft 1st Fixation
	Lever 800									Lever 800									SupLeft 1st Fixation
Sujeto	200	250	320	400	500	640	800		Sujeto	200	250	320	400	500	640	800			Lever 800
1				2.93807	2.93654	2.85889	2.77832		1									Sujeto	200	250	320	400	500	640	800
2					3.1131	3.09911	3.11499		2									1							2.89642
3			3.55475		3.34403	3.36575	3.3042		3									2					3.28736
4			2.85621	2.54847	2.93663	2.7344	2.73154		4									3
5						3.41915	3.58145		5									4
6				2.92673	2.73083	2.72139	2.84955		6									5					2.95969	3.20623	2.99806
7				3.21434	3.30454	3.50691	3.41897		7									6	2.58853		2.5809		2.59593	2.52269	2.66103
8		3.4337	3.49608	3.24466		3.34308	3.54968		8									7						2.62219	2.99771
9				2.40318	2.27553	2.64836	2.45585		9									8				3.99172	3.9805	3.80439	3.82154
10					3.46519		3.24225		10									9						3.18345
11	2.44943				2.34392	2.21235	2.3698		11									10
12			2.51813		2.65158	2.94111	2.90195		12									11			3.4077		3.32168	3.10847	3.45335
13					2.46657	2.39931	2.43239		13									12
14						2.91519	2.88966		14			3.91784		3.71422				13						3.14382	3.10114
15							2.7452		15	0	0		0		0	0		14
																		15					3.00071	3.16273	3.21259
	SupLeft 2nd Fixation									SupLeft 2nd Fixation
	Lever 800									Lever 800									SupLeft 2nd Fixation
Sujeto	200	250	320	400	500	640	800		Sujeto	200	250	320	400	500	640	800			Lever 800
1				2.96383	2.88815	2.95019	2.74955		1									Sujeto	200	250	320	400	500	640	800
2									2									1
3					3.54682				3									2
4			2.75471						4									3
5							3.70879		5									4
6									6									5					2.99217
7					3.38694	3.45449			7									6			2.6742				2.65677
8		3.55791		3.43029		3.36018			8									7
9									9									8				4.10014			3.8083
10									10									9
11									11									10
12									12									11
13									13									12
14									14									13	0	0				0
15	0								15	0	0	0	0	0	0	0		14
																		15
	SupRight 1st Fixation									SupRight 1st Fixation
	Lever 800									Lever 800									SupRight 1st Fixation
Sujeto	200	250	320	400	500	640	800		Sujeto	200	250	320	400	500	640	800			Lever 800
1				2.75254	3.01263	2.94217	2.94686		1									Sujeto	200	250	320	400	500	640	800
2					3.08532	3.29171	3.21189		2									1						3.22462
3							3.32185		3							3.53835		2							3.28861
4	2.5614		2.75651	2.75398	2.77949	2.80286	2.75723		4									3				3.28666	3.31236
5					3.15316	3.29005	3.36053		5									4		3.38866					3.06841
6			2.8371	2.82514	2.78854	2.81417	2.84214		6									5			3.08327	3.02857			3.0115
7					3.27273	3.19885	3.29959		7									6				2.54874		2.53238	2.65708
8			3.40649	3.33207	3.35125	3.17186	3.50887		8									7				2.50902	2.72472	2.69148	2.82619
9					2.63415	2.7387	2.70336		9									8					3.90856		3.95488
10				3.33584	3.10094	3.31599	3.26845		10									9
11				2.39316	2.44445	2.35914	2.37469		11									10
12				2.91359	2.84169	2.82901	2.89081		12									11
13					2.34537		2.47681		13									12
14	2.61813				2.88117	3.03551	2.96174		14									13						3.27522	3.11916
15		0		2.772		2.84403	2.76165		15	0	0	0	0	0	0			14
																		15	0					3.15959	3.27719
	SupRight 2nd Fixation									SupRight 2nd Fixation
	Lever 800									Lever 800									SupRight 2nd Fixation
Sujeto	200	250	320	400	500	640	800		Sujeto	200	250	320	400	500	640	800			Lever 800
1						2.81127	2.81653		1									Sujeto	200	250	320	400	500	640	800
2									2									1
3									3									2
4			2.67374				2.73264		4									3					3.26816
5									5									4
6									6									5				3.0659			3.00544
7						3.31432			7									6
8							3.70094		8									7
9							2.66949		9									8
10									10									9
11									11									10
12							2.84136		12									11
13							2.3786		13									12
14	2.64916								14									13
15		0		2.7338	0				15	0	0	0	0	0	0	0		14
																		15	0	0	0			3.21321
	Central 1st Fixation									Central 1st Fixation
	Lever 800									Lever 800									Central 1st Fixation
Sujeto	200	250	320	400	500	640	800		Sujeto	200	250	320	400	500	640	800			Lever 800
1				2.71077	2.8886	2.75511	2.88509		1			2.944	3.076	3.08	3.07	3.1165		Sujeto	200	250	320	400	500	640	800
2				3.39022	3.21887	3.23685	3.27034		2			3.441	3.48	3.436	3.459	3.512		1					2.81453	2.92959	3.04437
3	2.80923		3.57004		3.40123	3.52809	3.41801		3		2.866	2.848	2.862	2.81	2.726	2.8595		2	3.29624		3.25022		3.25456	3.32277	3.32935
4	3.47009		2.84325	2.50431	2.86796	2.61617	2.75996		4	3.138		3.738	3.88	3.665	3.637	3.829		3		3.54374	3.33341	3.32342	3.33929	3.32118	3.34306
5	2.70555	3.46592		3.44567	3.36709	3.38131	3.39925		5	3.8515			3.034	2.817	2.848	2.8935		4	3.07959	3.22101	3.17127	3.17621	3.13641	3.22087	3.15078
6			2.79562	2.78599	2.81123	2.81153	2.79165		6			4.16	3.768	4.021	4.041	4.057		5			2.99658	2.92819	2.93883	3.0394	2.90929
7	3.50273	3.11155	3.31641	3.20153	3.27457	3.18849	3.22242		7				3.307	3.1	2.965	3.0445		6	2.69248	2.84342	2.70535	2.61685	2.63221	2.67604	2.71985
8		3.49345	3.51325	3.3886	3.40282	3.35304	3.51151		8				3.453	3.454	3.438	3.5115		7		3.08998		2.52146	2.65354	2.55595	2.65679
9				2.74974	2.64365	2.74418	2.73397		9		3.192	3.228	3.039	3.178	3.306	3.224		8			3.87543	4.09765	4.1356	4.14156	3.96708
10	2.36632			3.52235	3.41852	3.49795	3.40977		10		3.388	3.364	3.508	3.574	3.52	3.4625		9		2.34691			2.63934	2.65216	2.58859
11				2.27372	2.32546	2.25739	2.33783		11	3.473		3.208	3.175	3.217	3.18	3.219		10				3.55763	3.27437	3.24039	3.35641
12	2.25462		2.59484	3.08934	2.77602	2.77846	2.9414		12			3.746	3.514	3.494	3.573	3.613		11	3.35927	3.33803	3.39539	3.54769	3.32159	3.28711	3.35325
13		2.33562		2.32614	2.38631	2.35769	2.38759		13	3.38	3.107	3.234	3.182	3.086	3.131	3.1315		12				2.89134	3.27155	3.13443	3.13978
14			2.84889	3.03531	2.95205	2.95421	2.91837		14			3.484	3.421	3.453	3.402	3.4295		13			3.26241	3.12703	3.08743	3.16628	3.1458
15			2.68555	2.73787	2.82864	2.85149	2.82029		15			3.851	3.369	3.371	3.46	3.487		14				3.35095	3.47134	3.44728	3.46779
																		15			3.37422	3.67219	3.39079	3.42627	3.38057
	Central 2nd Fixation									Central 2nd Fixation
	Lever 800									Lever 800									Central 2nd Fixation
Sujeto	200	250	320	400	500	640	800		Sujeto	200	250	320	400	500	640	800			Lever 800
1						2.73459	2.88634		1				3.38195			3.14258		Sujeto	200	250	320	400	500	640	800
2				3.33057	3.22823	3.19645	3.24351		2				3.73526	3.52358	3.68759	3.66145		1						2.98927	3.01626
3			3.72962		3.57189	3.36196	3.43274		3									2	3.30382				3.3952	3.63029	3.3786
4			2.75053				2.92185		4			3.64342	3.73532	3.79014	3.59964	3.70848		3				3.46566		3.38766	3.44475
5	3.56301	3.71593		3.59546	3.64433	3.48862	3.48827		5							2.63336		4				3.20984	3.19933	3.03814	3.13319
6				2.73757	2.74604	2.9038	2.83799		6						4.01643	4.14999		5			2.98293	3.0473	2.92404	3.04182	2.94785
7				3.48439	3.50228	3.3194	3.26442		7				3.2933		2.97926	3.10517		6	2.71581		2.73864	2.62652	2.6379	2.64782	2.72083
8					3.43999	3.25015	3.38343		8				3.54388	3.48313	3.46715	3.50647		7					2.83252	2.52622	2.76585
9							2.80785		9				2.67218	3.10918	3.28522	3.44978		8			3.97213	4.05265	4.17943	3.92515	3.90861
10						3.30445	3.3239		10		3.41331	3.42864	3.54525	3.57094	3.56717	3.54771		9					2.61125	2.72983	2.58127
11	2.44322			2.22489	2.33757	2.43732	2.35113		11				3.31066	3.4315	3.121	3.24635		10				3.42646	3.26045	3.46721	3.29082
12					3.33664	2.83366	2.77033		12	3.38919		3.59517	3.19839	3.48312	3.37905	3.47803		11					3.33313	3.31431	3.28807
13				2.47886	2.36545	2.43491	2.38435		13			3.34742	3.30968	3.27143	3.2911	3.12362		12				3.04716	3.33291	3.2048	3.15629
14			2.66151	2.95544	3.03973		2.97732		14							3.51729		13			3.21171	3.11992	3.08878	3.35833	3.13913
15				2.83079		2.87511	2.83758		15			4.22509	3.44688	3.37988		3.85542		14							3.58103
																		15			3.44345	3.69444	3.51843	3.41065	3.51734
	Central 3rd Fixation									Central 3rd Fixation
	Lever 800									Lever 800									Central 3rd Fixation
Sujeto	200	250	320	400	500	640	800		Sujeto	200	250	320	400	500	640	800			Lever 800
1							3.35564		1							3.21219		Sujeto	200	250	320	400	500	640	800
2				3.16742	3.4064				2									1						3.07092	3.16847
3						3.2608	2.82157		3									2
4			2.8536						4			3.90501			3.64355	3.56072		3				3.4738			3.54415
5		3.67856		3.75009					5									4				3.33976			3.18527
6									6									5			3.03226			2.85622	3.08412
7				3.77133			3.32217		7				3.295		3.03543	3.06487		6			2.76859		2.5958	2.79884	2.6694
8							2.8057		8				3.54019	3.482	3.36558	3.49968		7					2.75304	2.51187	2.39091
9							3.4234		9				2.88493	3.16828		3.44067		8			3.9022		4.05189	3.88863
10							2.545		10		3.53674	3.4954	3.6908	3.60795	3.63215	3.6604		9						2.72087	2.50093
11							2.69291		11				3.19618					10				3.46046
12							2.44317		12				3.35159	3.53784	3.38654	3.40467		11					3.30991	3.42141	3.28118
13						2.66912	3.04531		13				3.22655	3.2827		3.26756		12				3.11211			3.1949
14				2.98062					14									13						3.35589	3.09373
15	0					2.9085			15	0								14
																		15	0	0		3.78763	3.53273		3.3931
	Central 4th Fixation									Central 4th Fixation
	Lever 800									Lever 800									Central 4th Fixation
Sujeto	200	250	320	400	500	640	800		Sujeto	200	250	320	400	500	640	800			Lever 800
1									1							3.0686		Sujeto	200	250	320	400	500	640	800
2									2									1							3.43686
3									3									2
4									4							3.56512		3				3.44171			3.70251
5									5									4							3.20321
6				3.64968					6									5						2.84844	3.14094
7									7				3.37822			3.17787		6			2.79996
8							2.69993		8					3.46248		3.33783		7					2.87317
9							3.62057		9					3.21973		3.59614		8
10									10				3.82076	3.69526	3.53514	3.58175		9						2.63026	2.41906
11									11									10
12									12						3.44329	3.5553		11						3.50295	3.21226
13				3.1001			3.05404		13					3.10475		3.04562		12				3.07739	3.21219
14									14									13							2.9701
15	0	0			0	0			15	0	0	0						14
																		15	0	0		3.75332
	InfLeft 1st Fixation									InfLeft 1st Fixation
	Lever 800									Lever 800									InfLeft 1st Fixation
Sujeto	200	250	320	400	500	640	800		Sujeto	200	250	320	400	500	640	800			Lever 800
1				2.78272					1									Sujeto	200	250	320	400	500	640	800
2							3.72318		2									1						3.0811
3							2.65293		3									2
4					2.71735				4									3			3.53173	3.53303		3.16669
5							2.80893		5									4
6					2.76017				6									5							2.80913
7							3.24075		7									6	2.84821				2.59889
8				3.50555					8									7
9									9					4				8						4.12976	3.91475
10							2.14945		10									9						2.78605	2.77937
11					2.03817				11									10
12					3.12921		2.35894		12									11	3.45171						3.39188
13					2.42191	2.35141	2.90861		13									12						3.33732
14							2.82778		14									13				3.0314	2.91483	3.04157	3.06188
15	0	0	0	2.9579		2.76389			15	0	0	0	0		0	0		14
																		15						3.69348	3.14049
	InfLeft 2nd Fixation									InfLeft 2nd Fixation
	Lever 800									Lever 800									InfLeft 2nd Fixation
Sujeto	200	250	320	400	500	640	800		Sujeto	200	250	320	400	500	640	800			Lever 800
1				2.90019	2.93794	2.76974	2.94599		1									Sujeto	200	250	320	400	500	640	800
2				3.34644	3.09582	3.08681	3.14727		2									1						2.92623
3					3.34301	3.30849	3.64455		3									2
4			2.9144		2.68455	2.52811	2.74527		4									3
5				3.39078	3.29238	3.30104	3.33534		5									4
6				2.77677	2.77909	2.9299	2.83517		6						3.02665			5
7						3.2252	3.29674		7							3.4431		6	2.71923				2.62887
8				3.47213	3.33574	3.39867	3.52883		8									7
9							2.64309		9					4				8
10				3.4688	3.234	3.45992	3.41067		10									9
11					2.08555	2.26062	2.19629		11									10
12					3.10001	2.75781	2.89442		12									11
13					2.43763	2.32351	2.31779		13									12
14				2.91377		3.02321	2.935		14									13							2.94459
15	0	0		2.86949		2.69768	2.81723		15	0	0	0	0					14
																		15		0	0	0			3.0906
	InfRight 1st Fixation									InfRight 1st Fixation
	Lever 800									Lever 800									InfRight 1st Fixation
Sujeto	200	250	320	400	500	640	800		Sujeto	200	250	320	400	500	640	800			Lever 800
1				2.822	2.9657	2.59724	2.80765		1									Sujeto	200	250	320	400	500	640	800
2									2									1
3	2.82834								3									2
4			2.90374	2.65677		2.7743	2.67664		4									3							3.26974
5	2.73927								5									4					3.29553		3.15002
6			2.82071	2.70988	2.74446	2.73255	2.71662		6									5
7	3.42988			3.0057		2.98221	3.05621		7									6	2.53817		2.67281	2.53581	2.53346	2.60888	2.62317
8					3.42134	3.39302	3.34486		8									7					2.75977		2.71979
9				2.50291	2.53394	2.49755	2.71288		9									8
10	2.29563				3.33679	3.31853	3.35674		10									9
11				2.0998		2.23687	2.376		11									10
12					2.76647		2.93409		12									11							3.56146
13					2.48217	2.44778	2.43788		13									12
14			2.58681	3.14477	2.70539	2.67664	3.01996		14									13						3.17673	3.1452
15		0.001	2.86723				2.90302		15	0	0	0	0	0	0	0		14
																		15		0
	InfRight 2nd Fixation									InfRight 2nd Fixation
	Lever 800									Lever 800									InfRight 2nd Fixation
Sujeto	200	250	320	400	500	640	800		Sujeto	200	250	320	400	500	640	800			Lever 800
1									1									Sujeto	200	250	320	400	500	640	800
2									2									1
3							2.57539		3									2
4				2.5799		2.66642			4									3
5							2.72731		5									4
6						2.71459	3.08752		6									5			2.52485	2.54897			2.49864
7				2.94566			3.28267		7									6							2.56849
8							2.72834		8									7
9					2.53305	2.52929	4.0363		9									8
10							2.37913		10									9
11							2.91675		11									10
12							2.39864		12									11
13					2.43165	2.36111	2.89833		13									12						3.10866
14				3.16147	2.71143	2.73442	2.80585		14									13
15	0	0	0						15	0	0	0	0	0	0	0		14	0	0			0
																		15

## Sheet: Fig5_FixVal
Valid fixations to each Area of Interest during generalization trials
Peripheral Group									Central Group									BOTH Group
	SupLeft									SupLeft									SupLeft
	Lever 200									Lever 200									Lever 200
Sujeto	200	250	320	400	500	640	800		Sujeto	200	250	320	400	500	640	800		Sujeto	200	250	320	400	500	640	800
1	1.125	3	1	1					1									1	1				1		1
2	1	1	1	1	1				2									2
3	1.25	1	1	3	1	1			3		1							3
4	1	1							4									4							4
5	2		1	1					5									5	1	1	1.5			1
6	1	1	1						6									6	1		1		1
7	1.5	1	1	1			1		7									7
8	1.25		1	1	1		3		8									8			3
9	1	1		1	2				9									9
10	1	1	1	1					10									10							1
11	1	1	1	1	1	1			11									11	1	1		1	1
12	1	1	1	1	1				12									12
13	1								13									13		1	1
14	1								14									14	1
15			1	1	1	1			15	0		0	1	1	0	0		15			1	1
	SupRight									SupRight									SupRight
	Lever 200									Lever 200									Lever 200
Sujeto	200	250	320	400	500	640	800		Sujeto	200	250	320	400	500	640	800		Sujeto	200	250	320	400	500	640	800
1	1.16667	1	1	1					1									1	1				1
2	1	1	1	1			1		2									2	1
3	1.16667	1	1	2	1	2	1		3				1					3
4	1.5								4									4
5	1		1	1.5					5									5	2	1
6	1	1	1	1					6									6	1.5
7	1	1	1.5	1.5					7									7	1		1	1
8	1	1	1	2	1	2			8									8	1		2
9	1.375	1	1.5	2					9									9
10	1	1	1		2				10									10
11	1	1.5	1.5	1	1		1		11									11
12	1	1.5	1	1					12									12
13	1		2	1					13					1				13	1		1	1	1
14	1.25	1	1						14									14	1
15	1	1	2	3					15	0	0	0			0	0		15				1			0
	Central									Central									Central
	Lever 200									Lever 200									Lever 200
Sujeto	200	250	320	400	500	640	800		Sujeto	200	250	320	400	500	640	800		Sujeto	200	250	320	400	500	640	800
1	1.11111	1.33333	1	1			2		1	1.125	1.1	1.11111	1.5	1		3		1	1.025	1	1.1	1.11111	1.25	1	2
2	1.775	1.5	1.7	1.85714	2		1.2		2	1.2	1	1	1.2	1.66667	1	1		2	1.20526	1.1	1.125	1.1	1	1
3	1.15789	1.11111	1.125	1.3	1.28571	1.25	2.5		3	1	1	1	1	1	1			3	1	1	1.28571	1	1		1.41667
4	1.05556	1.5	1.5	1	2.5	1.5	2		4	1.175	1.3	1.6	1.75	1		1		4	1.21875	1	1.4	1.42857	1	1.4
5	1.94211	1.77778	1.6	1.71429	1.6	2.5			5	1	1	1	1	1		3		5	1.48809	1.44444	2.33333	2.75	1	2	1.58333
6	1.45625	1.4	1.25	1.25			1.25		6	1.23026	1.1	1	1	1	1			6	1.59375	1.625	1.6	1.5	1.25	1.33333	1.5
7	1.075	1.11111	1.125	1	1.25		1		7	1.15	1.4	1.3	1.66667	1				7	1.43684	1.44444	1.5	1.625	1.25
8	1.02778	1.375	1.14286	1.4	1.2	1			8	1.625	1.5	1.8	1.57143	2	1			8	1.25	1.1	2	2.25	2		6
9	1	1	1	1.5					9	1.31579	1.11111	1.22222	1.5	1.5				9	1.375	1.5	1.375	1.66667	1.6
10	1.1	1	1.33333	1.16667	1.33333		1		10	2.29445	2	2.77778	2.14286	2.5	5			10	1.05	1.4	1.25	1.5			3.33333
11	1.70556	1.8	1.77778	1.5	1.57143	2			11	1.1	1.1	1.22222	2.5	1.5				11	1.5	1.625	1.16667	1.75	1.57143	1.5	1.375
12	1.175	1.2	1.22222	1	1		1.75		12	1.58553	1.4	1.83333	2.66667		3.5	1.16667		12	1.07692	1.6	1.14286	1.85714	1.5	1.5	1.5
13	1.90351	1.44444	1.77778	1.625	1.5	2	1		13	1.55	1.33333	1.5	2	2		1		13	1.30526	1.2	1	1.125	1.33333
14	1.2	1.75	2	1	2	1	1		14	1	1	1.11111	1	1.16667	1	2		14	1.125	1	1	1.11111	1.5		2
15	1.07143	1.33333	1	1.5	1.5	3			15	1.125	1.6	1.2	1.5	2	3			15	1.275	1.5	2.375	1.5	1.6	1
	InfLeft									InfLeft									InfLeft
	Lever 200									Lever 200									Lever 200
Sujeto	200	250	320	400	500	640	800		Sujeto	200	250	320	400	500	640	800		Sujeto	200	250	320	400	500	640	800
1	1	1	1.5		1				1									1	1	1					2
2	1	1	1	1					2									2
3	1	1.5	1	2	2				3									3			1.5
4	1			2			1		4									4	1
5	1	1	1	1	1	1	1		5									5
6	1	1	1	1					6									6		2
7	1	1	2		1				7									7				1
8	1	1	1		1		2		8									8
9									9									9	1
10	1	1	1	1					10									10	1						1
11	1.5	1	2	1.5	1	1			11									11			1	1	1
12	1	1	1	1					12									12	1	1		1			1
13	1	1	2	1					13									13
14			3				1		14									14	2.5						1
15		2			1	1			15	0	0	0	0	0	0	0		15		1	1	1	1
	InfRight									InfRight									InfRight
	Lever 200									Lever 200									Lever 200
Sujeto	200	250	320	400	500	640	800		Sujeto	200	250	320	400	500	640	800		Sujeto	200	250	320	400	500	640	800
1	1	1	1.5		1				1									1	1	1					2
2	1	1	1	1					2									2
3	1	1.5	1	2	2				3									3			1.5
4	1			2			1		4									4	1
5	1	1	1	1	1	1	1		5									5
6	1	1	1	1					6									6		2
7	1	1	2		1				7									7				1
8	1	1	1		1		2		8									8
9									9									9	1
10	1	1	1	1					10									10	1						1
11	1.5	1	2	1.5	1	1			11									11			1	1	1
12	1	1	1	1					12									12	1	1		1			1
13	1	1	2	1					13									13
14			3				1		14									14	2.5						1
15		2			1	1			15	0	0	0	0	0	0	0		15		1	1	1	1
	SupLeft									SupLeft									SupLeft
	Lever 800									Lever 800									Lever 800
Sujeto	200	250	320	400	500	640	800		Sujeto	200	250	320	400	500	640	800		Sujeto	200	250	320	400	500	640	800
1				2	1.5	2.5	1.625		1									1					1		1
2					1	1	1		2									2
3			1		2	1	1		3									3
4			2	1	1	1	1		4									4					2.5	1
5						1	1.5		5									5			2		1	1	1
6				1	1	1	1		6									6	1					1	1.25
7				1	2	1.5	1		7									7				2	1	1	1
8		2	1	2		1.5	1		8									8						1	2
9				1	1	1	1		9									9
10					1		1		10									10			1		1	1
11	1				1	1	1		11									11							1
12			1		1	1	1		12									12						1
13					1	1	1		13									13							1
14						1	1		14			1		1				14					1	1
15							1		15	0	0		0		0	0		15							1
	SupRight									SupRight									SupRight
	Lever 800									Lever 800									Lever 800
Sujeto	200	250	320	400	500	640	800		Sujeto	200	250	320	400	500	640	800		Sujeto	200	250	320	400	500	640	800
1				1	1	1.5	1.25		1									1						1	1
2					1	1	1		2									2
3							1		3							1		3				1	2		1
4	1		2	1	1	1	2		4									4		1					1.16667
5					1	1	1		5									5			1	2			1
6			1	1	1	1	1		6									6				1		1	1
7					1	1.5	1		7									7				1	1	1	1
8			1	1	1	1	1.25		8									8					1
9					1	1	1.25		9									9
10				1	1	1	1		10									10
11				1	1	1	1		11									11
12				1	1	1	1.25		12									12							1
13					1		2.5		13									13						1
14	2				1	1	1		14									14							1
15		0		2		1	1		15	0	0	0	0	0	0			15						2
	Central									Central									Central
	Lever 800									Lever 800									Lever 800
Sujeto	200	250	320	400	500	640	800		Sujeto	200	250	320	400	500	640	800		Sujeto	200	250	320	400	500	640	800
1				1	1	1.16667	1.13333		1			1	1.25	1	1	1.35		1					1	1.55556	1.9
2				2	1.625	1.4	1.21053		2			1	1.2	1.28571	1.11111	1.05263		2	2		1		1.66667	1.11111	1.13158
3	1		1.5		1.66667	1.83333	1.4		3		1	1	1	1	1	1		3		1	1	1.42857	1	1.2	1.075
4	2		2.33333	1	1	1	1.4375		4	1		1.5	1.33333	1.22222	1.5	1.4		4	1	1	1	2	1.375	1.2	1.38095
5	1	3		2	2	1.625	1.74211		5	1			1	1	1	1.02632		5			3	1.5	1.28571	1.85714	2.1
6			1	1.16667	1.375	1.16667	1.20588		6			1	1	1	1.16667	1.10526		6	1.83333	1	2.2	1.5	1.66667	1.85714	1.82143
7	1	1	1	2.33333	1.2	1.5	1.21324		7				4	1	1.2	1.625		7		1		1	1.66667	2	1.37778
8		1	1	1	1.4	1.16667	1.30714		8				2	3	1.88889	1.625		8			2.5	1.33333	1.77778	1.5	1.375
9				1	1	1	1.25		9		1	1	1.5	2.25	1.3	1.2		9		1			1.5	2.44444	2
10	2			1	1	1.5	1.425		10		3	3	2	3	2	2.61667		10				2	1.4	1.28571	1.33333
11				1.5	2	1.28571	1.78947		11	3		1	1.625	1.125	1.2	1.125		11	1	1	1	1	1.66667	2	1.53333
12	1		1	1	1.25	1.33333	1.425		12			2	1.5	1.55556	1.875	1.825		12				4	1.2	1.25	1.57143
13		1		2	1.625	1.88889	1.88971		13	1	1	2	1.5	2.33333	1.4	1.47794		13			2	1.5	1.71429	1.4	1.83088
14			1.5	2.5	1.5	1	1.78571		14			1	1	1	1	1.07895		14				1	1	1	1.025
15			1	1.5	1	1.66667	1.375		15			2	1.5	1.25	1	1.05		15			1.5	4.5	2	1.55556	1.36471
	InfLeft									InfLeft									InfLeft
	Lever 800									Lever 800									Lever 800
Sujeto	200	250	320	400	500	640	800		Sujeto	200	250	320	400	500	640	800		Sujeto	200	250	320	400	500	640	800
1				1.5	1	1	1		1									1						2
2				1	1	1	1		2									2
3					1	1	2		3									3			1	1		1
4			1		2	1	2		4									4							1
5				1	1	1	1		5									5	2
6				1	2	1	1.125		6						1			6					3
7						1	1		7							1		7							1
8				2	1	1	1.16667		8									8						1	1
9							1		9					2				9						1
10				1	1	1	1		10									10	1						1
11					2	1	1.25		11									11
12					1.5	1	1		12									12						1	1.5
13					1.5	3	2		13									13				1	1	1
14				1		1	1.5		14									14							2
15	0	0		2		2	2.75		15	0	0	0	0					15						1
	InfRight									InfRight									InfRight
	Lever 800									Lever 800									Lever 800
Sujeto	200	250	320	400	500	640	800		Sujeto	200	250	320	400	500	640	800		Sujeto	200	250	320	400	500	640	800
1				1.5	1	1	1		1	0.0001								1						2
2				1	1	1	1		2									2
3					1	1	2		3									3			1	1		1
4			1		2	1	2		4									4							1
5				1	1	1	1		5									5	2
6				1	2	1	1.125		6									6					3
7						1	1		7						1			7							1
8				2	1	1	1.16667		8							1		8						1	1
9							1		9									9						1
10				1	1	1	1		10					2				10	1						1
11					2	1	1.25		11									11
12					1.5	1	1		12									12						1	1.5
13					1.5	3	2		13									13				1	1	1
14				1		1	1.5		14									14							2
15	0	0		2		2	2.75		15		0	0	0					15						1

## Sheet: Fig6_FixAll 
All fixations to each Area of Interest during generalization trials
Peripheral Group									Central Group									BOTH Group
	SupLeft									SupLeft									SupLeft
	Lever 200									Lever 200									Lever 200
Sujeto	200	250	320	400	500	640	800		Sujeto	200	250	320	400	500	640	800		Sujeto	200	250	320	400	500	640	800
1	1.375	6.5	3	1					1									1	1			1	1		1
2	1	1	1	1	1				2									2
3	1.25	1	1	5	1	1			3									3
4	1.125	1	2				1		4		1							4						2	14
5	3		1	1					5									5	2.5	4.5	1.5			4
6	1	1	1						6									6	1	1	1		1
7	4	1	2	1			1		7									7	1
8	1.8	1	1	1	1		3		8				5					8			5	1
9	2	2	1	1	6				9									9	2	3			2
10	1	1	1	1					10									10							1
11	1.66667	1	1	1	1	1			11									11	1.125	1	4	1	1
12	1	1	1	1.5	1				12									12
13	1.83333	2	2						13									13	1		1
14	2.16667		5						14									14	1
15	4	1	3.5	1	4.5	5			15	0		0		0	0	0		15	1	2	1	1
	SupRight									SupRight									SupRight
	Lever 200									Lever 200									Lever 200
Sujeto	200	250	320	400	500	640	800		Sujeto	200	250	320	400	500	640	800		Sujeto	200	250	320	400	500	640	800
1	1.5	2.5	2.5	2					1									1	1				1
2	1.125	1	1	1			1		2									2	1
3	1.33333	1	1	2.5	1	2	4		3				1					3
4	2.5	5		4	1				4									4
5	1		1.5	1.5					5									5	1.5	1.5	1
6	1	1	1	1					6									6	1.66667
7	1.125	1.5	2	3.5					7									7	1		7	1
8	1.5	1	1	2	2	5			8									8	1		3
9	2.625	1	5.5	5					9									9	1		2
10	1.25	1	1		2				10									10	1	1
11	1.625	2.5	2.5	1	1		1		11									11				1
12	2.66667	2	1.5	3					12	1								12	1	1				1
13	2.16667	1.5	2	1	3				13					1				13	1		1	1	1
14	1.75	3.5	1.5	1					14						1			14	1
15	1.625	1	2	4	7				15		0	0				0		15				2			0
	Central									Central									Central
	Lever 200									Lever 200									Lever 200
Sujeto	200	250	320	400	500	640	800		Sujeto	200	250	320	400	500	640	800		Sujeto	200	250	320	400	500	640	800
1	1.725	1.55556	1.5	1	1		2		1	1.25	1.1	1.11111	1.83333	2.75		4		1	1.225	1.2	1.3	1.7	1.5	1	3
2	1.975	1.6	2	2.14286	2		1.4		2	1.2	1.5	1.125	1.2	2.33333	1	1		2	1.31053	1.1	1.125	1.1	1	1
3	1.375	1.6	1.375	1.4	1.57143	1.75	11.6667		3	1	1	1	1	1	1			3	1.025	1	1.57143	1	1		1.75
4	4.46429	4	6	5	5.75	11	2		4	2.75	1.9	4.16667	3.25	1		1		4	1.875	2.33333	1.8	2	1	3	2
5	2.2	2.22222	2.1	2.28571	2.4	2.5			5	1.02632	1	1	1	1		4		5	5.05	3.6	3.83333	4.66667	6	2	2.25
6	1.66842	2	1.5	1.75			1.5		6	1.69737	1.1	1	1	1.16667	1			6	1.75	2.25	2	2.5	1.5	1.33333	1.5
7	1.35	1.33333	1.88889	2.28571	1.2		1		7	1.625	1.9	1.8	1.77778	1				7	3.775	3.55556	2.8	2.22222	4
8	1.55	2	2.375	3.33333	2.6	2			8	1.95	3.5	4	3.57143	3.5	1			8	2.2	1.5	2.75	3.25	2		28
9	3.17647	3.5	2.85714	3.83333					9	1.86316	1.33333	1.22222	1.66667	1.5				9	4.425	4	6.5	4.11111	2.57143	5
10	1.375	1.5	1.5	1.85714	1.66667		3		10	5.175	5.44444	5.44444	3.85714	7	11			10	4.25	5.3	5.77778	8.75	11		5.66667
11	2.23889	2.2	2	2.625	2.28571	2			11	1.1	1.1	1.22222	3	1.5				11	3.15789	2.33333	3.28571	2.55556	2.42857	3	3.5
12	1.425	1.4	1.44444	1.5	1		2.75		12	2.275	1.4	5.5	3.33333		8.5	1.5		12	2.2	3.4	2	3.66667	2.33333	2.66667	1.5
13	2.11579	1.66667	1.8	1.875	2.5	3	14		13	2.1	1.77778	1.83333	2.16667	2.75		1		13	1.3579	1.2	1.33333	1.25	1.66667
14	4.73333	5.1	4.57143	6	10	6.5	10		14	1	1	1.22222	1	1.16667	1	3		14	1.5	1.1	1	1.11111	1.5		2.5
15	4.55	4.1	4.66667	5.6	8.5	8.25			15	1.125	1.6	1.6	1.5	2.5	4			15	1.5	1.9	4.625	2.625	2.2	1	1
	InfLeft									InfLeft									InfLeft
	Lever 200									Lever 200									Lever 200
Sujeto	200	250	320	400	500	640	800		Sujeto	200	250	320	400	500	640	800		Sujeto	200	250	320	400	500	640	800
1	1.66667	1	4		1				1									1	1	1					4
2	1.125	1	1	3	1		2		2									2
3	2	1.5	1	1.5	2				3									3		3	3
4	3.66667	4.5	4	1	3.5	4			4									4	1.5
5	1.66667	1.5	1	1	2	1			5									5	4			2			4
6	1	1.5							6									6		6		6	8	1
7	1.33333	4.5	3	5	1.5				7									7				7.5
8	1.75	1	1.5	1		1			8									8
9	2	5	6	4					9									9	1.25
10	1	1	1	1.5					10									10	2		3	1			1
11	2.125	3.5	2	3	1	1			11				4					11	2		1.5	2	1
12	1.25	1	3.5	1			14		12									12	1	2		1			1
13	1.625	5	3.5	9			10		13									13
14	2.5	2	5			2			14									14	5						1
15		4	1		2	9			15	0	0	0		0	0	0		15		1	1	1	1.5
	InfRight									InfRight									InfRight
	Lever 200									Lever 200									Lever 200
Sujeto	200	250	320	400	500	640	800		Sujeto	200	250	320	400	500	640	800		Sujeto	200	250	320	400	500	640	800
1	5.5	1.5	1.5	1	1				1									1			2	1
2	1	1	1	1	1				2									2				3
3	1.25	1	1	3	1	1			3									3						1
4	1	1							4									4				1
5	2		1	1					5									5	1	1.5	1				3
6	1	1	1				1		6									6	2		3
7	1.5	1	1	1			3		7									7
8	1.25	1	1	1	1				8									8				6
9	1	1		1	2				9									9	2.16667	2	1	2
10	1	1	1	1					10									10			1	1
11	1.75	1.5	2	1	1	1			11									11			3
12	1.5		4				1.5		12				1					12		5	1
13	3.5	4.5	2.5	2	1				13									13
14	3	2	3		4	8	2		14									14	1	1		1			4
15	2	5.5	1	1.5	5	8			15	0	0	0		0	0	0		15		1	1	1	1.5
	SupLeft									SupLeft									SupLeft
	Lever 800									Lever 800									Lever 800
Sujeto	200	250	320	400	500	640	800		Sujeto	200	250	320	400	500	640	800		Sujeto	200	250	320	400	500	640	800
1				4	2.5	4	2.5		1									1						1	1
2					1	1	1		2									2					1
3			2		2	1	1		3									3
4			3	1	1	1.5	2.5		4									4
5				1		1	1.75		5									5	1				4	1	1
6				1	1	1	1		6									6			2		1	1	2.75
7				3	3	3.5	1.75		7									7						1	1
8		5	1	2		2.5	1		8									8				3	2.5	3	3
9				5	1	1.5	2.33333		9									9						5
10					1		1		10									10			1	1			1
11	1				1	1	1		11									11			1		1	1	1.33333
12			1		1	1	1		12									12				1	2		2.5
13				2	3	3	3		13									13						1	1
14					1	6	5.33333		14									14
15				1		3	3		15	0	0	1	0	1	0	0		15			2		1	1	2
	SupRight									SupRight									SupRight
	Lever 800									Lever 800									Lever 800
Sujeto	200	250	320	400	500	640	800		Sujeto	200	250	320	400	500	640	800		Sujeto	200	250	320	400	500	640	800
1				2	1	1.5	1.375		1									1						1	2
2					1	1	1		2									2
3							1		3							1		3				1	2		2.5
4	1		5.5	2	1	1.5	2.33333		4									4		1			2		1.875
5					1	3	1.25		5									5			9	2	2		1
6			1	1	1	1	1		6									6				1	1	1	1.5
7					1	3.5	1.75		7									7				2	2	1.5	3.5
8			1	1	1	1	2.125		8									8				4	3		1
9				3	4	4	3.5		9									9							1
10				1	1	1	1		10									10				2			1
11				1	1	1	1.33333		11							1		11							1
12				1	2	3	1.25		12									12					2		1
13					5	3.5	4.25		13									13						1
14	4				2.5	2.5	2.25		14									14							3
15		0		3		2.5	2.33333		15	0	0	0	0	0	0			15					2	8
	Central									Central									Central
	Lever 800									Lever 800									Lever 800
Sujeto	200	250	320	400	500	640	800		Sujeto	200	250	320	400	500	640	800		Sujeto	200	250	320	400	500	640	800
1				1.33333	1.375	2	1.675		1			1	1.25	1	1	1.475		1	2				1	2.55556	2.45
2				2	1.625	1.6	1.34211		2			1	1.4	1.28571	1.11111	1.23684		2			2		1.66667	1.22222	1.18421
3	6.125		1.5		2.33333	2.33333	1.53333		3		1	1	1	1	1	1		3	1.5	1	1	2.14286	1	2	1.125
4	2	1	4.2	2.75	4.83333	2.66667	6.5625		4	1		2	1.33333	2.22222	2.5	1.75		4		1.75	1	4	1.375	1.2	1.58333
5	2	4		3.66667	2	1.75	2.04737		5	1			1	1	1	1.02632		5	2.66667		4	2.75	2.55556	4	4.54737
6			2	1.66667	1.7	1.4	1.55		6			1	1	1	1.16667	1.21053		6		1	3.6	1.5	3.16667	3	2.21429
7	1	1	1	2.66667	2.4	1.7	1.73611		7				7	1.14286	1.6	2.45		7		1		1	2.16667	3.6	2.08889
8		1	1	1.75	1.4	2.5	1.73333		8				5	4.625	5.44444	2.6		8			3.5	2.33333	2.44444	2.8	1.75
9		4	2	2.75	4.25	4.11111	5.72222		9		1	1	1.75	2.875	1.3	1.475		9		9		8	5	8.44444	6.55
10	3			1.66667	1	2	2.275		10		4	10	6.66667	7.14286	6	6.11579		10	2		4	7.83333	4.88889	5.4	4.96316
11				2	2	1.57143	1.89474		11	3		1	1.75	1.125	1.4	1.15		11		1	1.33333	1	4	4	2.6
12	1		1	1	1.5	2.1	1.825		12			2.5	4	3.1	2.125	2.35		12			3	9	3.28571	3.28571	2.72917
13	3	1		4.5	1.75	2.22222	2.23611		13	1	1	2.25	2	3.66667	2.2	2.5		13			2	1.5	2.14286	1.8	2.01471
14			4.33333	4.83333	6.4	5.14286	7.01875		14			1	1	1	1	1.07895		14				1	1	1	1.25
15			11	5.25	9	7.16667	7.92105		15			5	1.5	1.75	1	1.05		15			2	4.5	2.6	2	2.21177
	InfLeft									InfLeft									InfLeft
	Lever 800									Lever 800									Lever 800
Sujeto	200	250	320	400	500	640	800		Sujeto	200	250	320	400	500	640	800		Sujeto	200	250	320	400	500	640	800
1				2	1	1	1		1									1						2
2				4	2	1	1.125		2									2
3			1		3	1	1		3									3			4	2		1
4	1		3	5		2	3.625		4									4							4
5				1		2	1.125		5									5	2				3		4.25
6	1		1	1	1	1.5	1.125		6						1			6					4
7				2		1	1.25		7							1		7							1.33333
8	1				1	3	1.125		8									8						1	1
9				1	4	3.5	5.625		9					7				9						1.5	2
10					1	1	2.5		10				1					10	1				3.5	3.5	1
11					2	1	2.75		11			3						11
12					1.5	3	1		12									12			1			1	1.5
13				8	3	10.5	7.5		13									13				1	1	1.5
14				2.5	4	5	7.83333		14							1		14							2
15		0		5.5		2	5.5		15	0								15						1
	InfRight									InfRight									InfRight
	Lever 800									Lever 800									Lever 800
Sujeto	200	250	320	400	500	640	800		Sujeto	200	250	320	400	500	640	800		Sujeto	200	250	320	400	500	640	800
1				1	1	1	1		1									1							1
2					1	1	1		2									2
3			1		2	1	1		3									3					1		2
4			2	1	1	1	1		4									4						1	1
5						1	1.5		5									5			2	1.5	1	1
6				1	1	1	1		6									6	1				1	4	2
7				1	2	1.5	1		7									7						1	4.5
8		2	1	2		1.5	1		8									8
9				1	1	1	1		9									9				6	2	6
10					1		1		10									10						4	4.5
11	1			1		2	1.375		11									11					1	2	1.33333
12					1		2		12									12						3	1.5
13					2	1.5	1.75		13									13							1.75
14			1	3	5	2	3.625		14			1		1				14					1
15			1				3.66667		15	0	0		0		0	0		15						1	1

## Sheet: Fig7_FixExt
Fixations to extended Areas of Interest during generalization trials
Peripheral Group									Central Group									BOTH Group
	SupLeft									SupLeft									SupLeft
	Lever 200									Lever 200									Lever 200
Sujeto	200	250	320	400	500	640	800		Sujeto	200	250	320	400	500	640	800		Sujeto	200	250	320	400	500	640	800
1	1.375	4.5	3	1					1							0.0001		1	1	1.5	6	1	2		1
2	1.25	2	1	1	1				2									2
3	1.25	1	1	4	1	1	2		3									3
4	2	1	2						4		1							4				1		2	14
5	1	1.5	1	1					5									5	2.625	4.5	1.5			5
6	1	1	1	1			1		6									6	1.5	1	1		1
7	1.5	1	2	1	1		2		7		1							7	1		1
8	2.2	1	1	1	1				8				2					8		2	1	5
9	1.625	2.5	1.5	2	6				9									9	2	2.5	1	1	1.5
10	1	1	1	1					10	5								10	1.75	2	1	4			1
11	1.33333	1	1	1	1	1			11			1						11	1	1	2	1	1	1	2.33333
12	1.25	1.5	1	1.5	7				12									12	1.16667	1		2	1	4
13	2.375	2.5	2	2		1			13									13	1		1
14	1.9	1.5	4.66667	2			2		14									14	1		1	2
15	4.25	1	3.5	2	5	5			15					0	0			15	1.16667	1	1	2
	SupRight									SupRight									SupRight
	Lever 200									Lever 200									Lever 200
Sujeto	200	250	320	400	500	640	800		Sujeto	200	250	320	400	500	640	800		Sujeto	200	250	320	400	500	640	800
1	1.5	1	2.66667	2					1							0.0001		1	1				1		2
2	1	1.5	1	1			1		2									2	1	1
3	1.66667	1	1	1.5	1	2	2		3									3	2
4	1.5	1.66667		2	1	2	1		4				1					4	1	2	1			3	1
5	1.33333	1	2.5	1.5					5									5	1.5	1	1.5				1
6	1	1	1	1					6									6	2			1
7	1	1	1	2	2				7									7	1.5		3	1
8	1.375	1	1	3	2	1			8			1	1					8	1		1				1
9	1.375	1	3	1					9									9	1.8		3	1	2
10	1.75	1	1		2				10		1							10	1.16667	1.5	1				2
11	1.125	2	1	1	1		1		11									11	2.75	4.5	2	1	1.5	1
12	1.625	1	1.5	2					12									12	6	3			1	1
13	1.75	1	3	1	4	1			13	1.2	1		1	2				13	1.75		1	1	1
14	1.83333	1.5	3.66667	4.5	1				14					1				14	1			1
15	1.40909	1.8	2.33333	1.5	14	3			15						2			15	1	1	3	2
	Central									Central									Central
	Lever 200									Lever 200									Lever 200
Sujeto	200	250	320	400	500	640	800		Sujeto	200	250	320	400	500	640	800		Sujeto	200	250	320	400	500	640	800
1	1.55	1.22222	1.4	1	1		2		1	1	1	1.11111	1.33333	1.5		1		1	1.275	1.3	1.5	1.3	1.625	1	3
2	2.05	1.9	1.8	2	2		1.4		2	1.2	1.1	1.125	1.2	1.33333	1	1		2	1.10526	1.1	1.125	1.1	1	1
3	1.6	1.5	1.625	1.3	1.85714	1.25	3.33333		3	1	1	1	1	1	1			3	1.05	1	1.14286	1	1		1.25
4	2.38542	2.66667	3.75	2	2.75	3.25	2		4	1.35	1.1	1.5	1.75	1		1		4	1.375	2.16667	2.6	1.42857	1	2.8	3
5	2.04737	2.33333	2.4	1.85714	2	2.5			5	1	1	1	1	1		1		5	2.15	2.3	2.28571	2.16667	2	2	1.58333
6	1.6421	2	1.5	1.75			1		6	1.20395	1	1	1	1	1			6	1.72794	1.625	1.8	1.75	1.25	1.33333	1
7	1.325	1.11111	1.55556	2.28571	1.8		1		7	1.275	1.4	1.5	1.11111	1				7	1.75	1.77778	1.5	1.11111	1.5
8	1.25	1.33333	1.25	1.5	1.4	1.5			8	1.425	2	1.7	1.85714	2	1			8	1.325	1.3	1.625	2	1		5
9	2.525	2.66667	2.11111	3.16667	2				9	1.175	1	1	1.16667	1				9	1.85	2.11111	2.5	1.66667	1.57143	3
10	1.3	1.5	1.2	1.42857	1.33333		2		10	1.975	1.44444	1.55556	1.42857	1.66667	2			10	2.15	2.4	2.33333	2.75	2		3
11	2.08333	1.8	2.3	1.75	1.71429	2			11	1	1	1.11111	1.5	1.5				11	2.17105	1.88889	2	2	1.71429	2.5	2.75
12	1.45	1.5	1.33333	1.625	1.5		2.25		12	1.25	1	2.25	1.5		2.5	1		12	1.275	1.3	1.44444	1.55556	2	2.66667	1.5
13	2.16842	1.88889	1.8	2	2	4	4		13	1.175	1.22222	1	1.5	1.5		1		13	1.38421	1.2	1.33333	1.125	1.33333
14	2.78947	2.6	2.28571	1.75	4	3	2.5		14	1	1	1.11111	1	1.16667	1	1		14	1	1.1	1	1.22222	1		2
15	2.775	3.1	3.22222	2.8	2.85714	4.25			15	1	1	1.2	1	1	4			15	1.45	1.6	2.625	2.125	1.4	1
	InfLeft									InfLeft									InfLeft
	Lever 200									Lever 200									Lever 200
Sujeto	200	250	320	400	500	640	800		Sujeto	200	250	320	400	500	640	800		Sujeto	200	250	320	400	500	640	800
1	1.375	1	1.5		1				1									1	1	1		1	1		3
2	1	1	1	2					2	1								2	1
3	2.16667	1.5	1.5	4	4		2		3									3		1	2				1
4	1.11111	1	1.5	1		1	1		4									4	1	7	1	1		1
5	1.5	1	2	1	1	3			5									5	1.5	5	1	6			2
6	1.25	1	1	1					6									6	1.33333	1.5	1	1.5	1	1
7	1.125	1	2		3		1		7	1	1	1						7	1			2
8	1	1	2	1	1				8									8
9	2.16667	1	1	1					9									9				1	1
10	1	1	1	2					10					1				10	1.1	2	2.5	1			1
11	1.5	1.5	1	1	1	2			11									11	1	1	1	1	1
12	1	1	1.5	1			3		12				1					12	1	2		1			1
13	1.75	1.5	2	5			3		13									13	1	1
14	1	1.25	1.5			3			14									14							1
15	1.875	1.5	2.5		1	3			15						1	0		15	1.66667	1	1	1.5	1.5
	InfRight									InfRight									InfRight
	Lever 200									Lever 200									Lever 200
Sujeto	200	250	320	400	500	640	800		Sujeto	200	250	320	400	500	640	800		Sujeto	200	250	320	400	500	640	800
1	2	3.5	1	1	1				1									1	1				1
2	1	1	1.5	2	1				2							0.0001		2			3	1
3	1.375	1.5	1	1.5	2		4		3									3	1			3
4	2.16667	1.5	2	1	1.5	2			4									4			5			1
5	1.25	2	1	1	1.5	1			5									5	1.66667	2	3	1			1.5
6	1	1							6									6	1	1	1			1
7	1	2	2.5	6	1				7									7	1.5		1
8	1.25	1	1.5	1		1			8									8
9	1.1	3	4.5	5					9									9				7
10	1	1	1	1.5					10									10	1.125	1	2	1
11	2	1	1.5	1	1	1			11									11	1	1	1	1		5
12	1.66667	1	3	4					12									12			1	7
13	2.6	4.5	1	1	1	1	1		13	2								13	2	1	1
14	1.375	2	1		2	1			14	1			1					14							3
15	2	4.5	1	1	1	1	2		15		0	0		0	0			15	1	1	2	1
	SupLeft									SupLeft									SupLeft
	Lever 800									Lever 800									Lever 800
Sujeto	200	250	320	400	500	640	800		Sujeto	200	250	320	400	500	640	800		Sujeto	200	250	320	400	500	640	800
1				4	2	3.5	2		1									1						2	1
2					2	1.33333	1.125		2				1					2			1		1
3			2		2	1	1		3									3	1					1
4			5	1.5	1.5	2	4		4									4			3
5	2			2	1	1	1.625		5									5	1			1	4	1	1.16667
6				1	1	1	1		6									6			2	1	1	1	1
7				1	1.5	1.5	1.25		7					2				7						2	2
8		1	1	2		2	1		8					5				8			1	1	1	1	1.16667
9				5	1	2.5	2.375		9									9						6	1
10					2	1	1		10				1			1		10			3	1	2	2.5	2.25
11	1				1	1	1		11									11			1		1	1	1
12			1		1	1	1.125		12									12				1	1.5	1	1
13				2	3	2.33333	2.25		13					1		1		13					1	1	1.5
14				2	2.5	3.5	4.75		14									14
15				2		2	2.5		15	0	0	1		1	0			15			1		1	1.5	1.5
	SupRight									SupRight									SupRight
	Lever 800									Lever 800									Lever 800
Sujeto	200	250	320	400	500	640	800		Sujeto	200	250	320	400	500	640	800		Sujeto	200	250	320	400	500	640	800
1				2	1	1	1.25		1									1						1	1
2					1.5	1	1.625		2									2					1	1	2.66667
3							1.16667		3									3				2	1
4	4		2.5	1	1	3	2.6		4							1		4		1		1	1	5	2
5		2			1	3	1		5									5	1		4	1	1	1	1.92857
6			1	1	1	1	1		6									6			1.5	1	1	1	1
7				1	1	1.5	1		7									7				1	1	1	1
8			1	1	1	1	1.8		8				1	1.5				8				1	2	1	1.4
9				3	1.5	2.5	1.9		9									9						4	2
10				1.5	2	1	1		10									10	1			1	2	1	2.125
11				1	1	1	1		11									11			1				2.95
12			1	1	2	1	1.5		12							1		12					1	2	1
13					1	3	1.7		13						1	1		13						1	1.25
14	2		1	1	4.66667	6.75	2.875		14									14							1
15			1	2	3	8.5	11.7		15	0	0	0						15					1	3	2
	Central									Central									Central
	Lever 800									Lever 800									Lever 800
Sujeto	200	250	320	400	500	640	800		Sujeto	200	250	320	400	500	640	800		Sujeto	200	250	320	400	500	640	800
1				1.5	1.125	1.55556	1.475		1			1	1	1	1	1.125		1	1				1	2	1.55
2				2	1.875	1.8	1.44211		2			1	1.4	1.14286	1	1.05263		2			1.5		2	1.11111	1.23684
3	3.375		1.5		2	1.83333	1.46667		3		1	1	1	1	1	1		3	1.25	1	1	1.42857	1	1.7	1.1
4	3	1	2.83333	2.5	2.66667	2.16667	3.875		4	1		1.25	1.16667	1.22222	1.3	1.2		4		1.5	1.6	1.66667	1.25	1.6	1.41667
5	2	2		2.33333	2	1.75	1.79474		5	1			1	1	1	1		5	2.5		1	1.5	2	1.875	2.55263
6			2	1.66667	1.7	1.4	1.425		6			2	1	1	1	1.02632		6		1	2.6	1.5	2.16667	2	1.89286
7	1	1	1	3	1.6	1.6	1.61111		7				3	1.28571	1.1	1.325		7		1		1	1.5	1.4	1.69444
8		1	1	1.5	1.4	1.875	1.53889		8				2.66667	2.125	2.44444	1.475		8			1.5	2	2	1.5	1.3
9		1	3	2.5	2.88889	2.9	3.125		9		1	1	1	1.125	1.1	1.2		9		3		3	3.66667	2.77778	1.96154
10	2			1.66667	1.14286	1.5	1.45		10		1	1	2	2.28571	1.44444	1.98421		10	1.5		3	3.16667	2.55556	2.4	2.65
11				2	2	1.57143	1.94211		11	1		1	1.375	1	1.1	1.1		11		1	1.33333	1	2	2.25	2.25625
12	1		1	1	1.375	1.6	1.7		12			1.5	1.25	1.3	1.375	1.25		12			2	2	2.14286	1.42857	1.55208
13	3	1		2	1.75	1.88889	2.02778		13	1	1	1	1.25	1.66667	1.1	1.05882		13			2	2	1.28571	1.5	1.30147
14			3.66667	2.5	2.375	3.625	2.68889		14			1	1	1	1	1.02632		14				1	1	1	1.225
15			4	2.4	3.33333	3.33333	3.85526		15			3	1.5	1	1	1.05		15			1.5	2	1.8	1.88889	1.6
	InfLeft									InfLeft									InfLeft
	Lever 800									Lever 800									Lever 800
Sujeto	200	250	320	400	500	640	800		Sujeto	200	250	320	400	500	640	800		Sujeto	200	250	320	400	500	640	800
1				1.5	1	1	1		1	0.0001						1		1						2	2
2	1			1	1.5	1	1		2									2							2
3					2	1	1.16667		3									3			2	1		1
4	1		1		2	2	1		4				1					4		1		1	1
5				1	1	1	1		5									5	3			1	1	1.5	1.25
6				1	1	1.5	1		6									6		1	3		2	1	1.16667
7						1	1.125		7						1	2		7
8				2	1	2	1		8							2		8					1	1	1.75
9				2	1	3	1.6		9									9						1.5	1
10				1	1	1	1.33333		10					3				10	1			1	2.5	3	1.5
11					2	1	1.625		11				1					11						1	1.66667
12					1	1	1		12			1						12			2			1
13				1	1.5	4	2.4		13					1				13			1	2	1	1	1
14				1	2	2	1.66667		14									14
15		0		7.5		2	1.7		15		0		1					15						2.5	1.75
	InfRight									InfRight									InfRight
	Lever 800									Lever 800									Lever 800
Sujeto	200	250	320	400	500	640	800		Sujeto	200	250	320	400	500	640	800		Sujeto	200	250	320	400	500	640	800
1				1	1	1	1		1	0.0001								1							1
2				6	1.5	1	1.25		2									2			1	1			1
3	1		1		3	1.5	1		3									3					2		1
4			1	1	1	1	2.1		4									4					1.5	1	1
5	1			1		1	1.125		5									5	2		1	1	1	1	3
6			1	1	1	1.5	1		6									6					1.5	2	1
7	1			1.5		1	1.125		7									7				2	7	1	2.5
8					1.5	1	1		8									8
9				1	1.5	2	2.4		9									9				2	1	1
10	1				1	1	2		10					1				10						1	2.60714
11				1		1	1.4		11									11					1	1	1.375
12					1	1	1.125		12									12						2	1.5
13					2	1.5	1.75		13									13							1
14			1	2.5	1	1	1.8		14									14					1
15		0	1				2.33333		15		0	0	0		0	1		15							1

## Sheet: Sup_CumFix
Suplementary Figure: Total cummulated fixation time per trial
Peripheral Group									Central Group									BOTH GROUP
	TOTAL									TOTAL									Total
	Lever 200									Lever 200									Lever 200
Sujeto	200	250	320	400	500	640	800		Sujeto	200	250	320	400	500	640	800		Sujeto	200	250	320	400	500	640	800
1	1860.23	2820.39	2945.74	3680.76	1648.85	0	0		1	500.941	618.091	733.268	754.31	872.259		0		1	1088.11	1447.46	857.321	805.466	2272.74	1315.8	0
2	1953.22	2077.54	2446.47	2785.52	2821.14	0	1555.11		2	872.778	855.336	1021.81	1359.74	1608.32	937.085	2352.61		2	1063.59	809.485	954.57	1116.52	1110.82	1874.16	1245.98
3	3029.39	4447.94	3920.63	5915.37	4229.76	4037.14	3905.9		3	671.418	717.768	899.414	1067.77	1122.2	1176.44	1415.55		3	742.663	779.832	1593.76	1747.81	1036.84	0	0
4	819.092	732.696	491.294	432.916	736.69	828.503	594.012		4	719.761	747.652	820.683	827.437	1435.43		0		4	766.986	661.278	1000.91	897.242	1116.66	1012.82	1359.15
5	1461.64	1209.64	1810.34	2157.72	1798.45	2193.04	1794.32		5	671.709	675.855	789.54	948.487	1209.55		1973.8		5	918.579	1030.77	943.875	785.446	332.89	1049.31	1082.24
6	1421.38	1743.82	2229.69	2281.71	0	0	0		6	722.569	747.695	775.374	917.141	1013.48	1714.63	1425.56		6	1474.93	2714.67	2035.29	916.195	1536.33	1065.95	1893.36
7	1514.02	2498.8	2771.79	2917.94	1551.26	0	1091.61		7	521.381	570.186	598.148	793.138	870.682		0		7	887.81	690.18	1289.14	1479.63	936.815	0	1124.17
8	1658.75	1545.22	2507.08	1689.03	2011.84	1206.21	2053.2		8	698.847	781.606	873.312	734.938	986.839	1475.47	0		8	906.201	663.964	1543.13	952.002	1216.08	0	0
9	740.723	1042.87	718.573	1002.18	316.34	0	0		9	735.076	726.607	974.727	1076.58	1206.27		0		9	286.723	353.817	468.754	572.965	262.054	119.505	2053.47
10	1730.38	2278.93	4930.99	3410.82	1827.74	0	0		10	596.654	691.144	934.792	888.688	837.407	1216.25	0		10	334.054	384.454	399.868	573.022	418.519	0	0
11	1988.39	2033.41	2250.1	2544.17	3067.83	2558.95	1115.81		11	962.498	1132.49	1222.84	2761.42	1475.43		0		11	750.673	696.695	720.364	1351.41	1432.74	797.547	3110.39
12	1642.09	1595.59	2629.78	2529.22	1573.97	0	0		12	825.456	845.329	692.88	1335.84		1126.59	0		12	308.314	199.285	447.099	1013.97	89.771	279.248	191.94
13	1905.02	1027.1	2259.54	1551.06	832.565	2231.69	1236.61		13	862.75	782.771	1046.51	1029.83	1257.48		1468.4		13	969.832	949.122	1676.93	1522.74	1608.31	0	1241.15
14	752.634	586.562	854.233	194.223	732.865	557.84	824.045		14	995.214	1028.83	1216.19	1073.82	1611.62	717.735	2153.32		14	1101.14	739.717	789.534	1041.23	1196.31	0	0
15	853.577	1175.76	655.117	1252.48	1457.2	1970.46	732.8		15	1006.05	1399.58	1160.34	1405.57	2302.93	4226.91	2193.24		15	1428.67	2041.67	2584.55	3239.79	1660.91	478.471	4286.55
	TOTAL									TOTAL									Total
	Lever 800									Lever 800									Lever 800
Sujeto	200	250	320	400	500	640	800		Sujeto	200	250	320	400	500	640	800		Sujeto	200	250	320	400	500	640	800
1	0	0	0	3772.72	3242.15	3642.86	4029.96		1	0		677.842	917.145	930.413	961.021	1055.72		1	0	0	0	0	1126.51	1745.76	1623.43
2	0	0	0	2212.92	3471.77	3317.76	3928.97		2	0		1485.36	1216.18	1284.57	1176.37	1220.96		2	957.119	0	1176.39	0	1169.78	1304.85	1759
3	0	0	3220.03	0	3316.39	3190.09	4235.56		3	0	777.59	637.976	777.606	1049.97	1007.97	1113.69		3	0	857.333	1402.01	1489.66	1663.69	1750.5	1822.8
4	406.718	0	1550.55	927.14	1021.25	1668.4	1235.19		4	0		1595.02	2013.74	979.206	893.24	1134.47		4	610.635	882.309	929.082	810.785	1420.56	1228.18	1811.56
5	897.173	677.854	0	1727.82	2065.43	2990.48	3216		5	558.342			923.754	971.978	1128.52	1080.11		5	0	0	998.93	949.215	1183.43	1282.53	1690.64
6	799.47	0	1065.94	2381.8	2369.72	2853.67	3354.95		6	548.284		618.098	757.598	971.991	1036.75	1201.9		6	1343.43	1249.17	2038.79	2317.69	2439.91	3045.3	2378.36
7	0	578.215	937.107	1974.16	2573.81	3343.74	3089.55		7	0			897.244	786.124	781.584	970.944		7	0	599.67	0	682.88	1929.01	1680.41	1870.13
8	777.566	1116.46	1236.05	2387.33	2045.38	2472.37	2659.54		8	0			890.595	1054.12	903.833	1223.66		8	0	0	1166.3	1860.97	1344.93	1014.74	1608.4
9	0	83.25	33.3699	827.23	1492.76	1040.77	1262.34		9	0	697.846	1455.45	707.841	934.611	1092.61	972.941		9	0	418.454	0	238.884	372.208	2736.23	740.742
10	0	0	0	1827.66	4100.19	2813.15	2750.82		10	0	877.374	817.223	518.266	868.779	782.065	1108.69		10	0	0	99.749	784.364	376.76	602.133	313.946
11	1340.77	0	0	1249.38	2164.89	2822.78	3151.63		11	0		1236.06	2424.94	1729.65	1409.63	1426.54		11	229.239	538.356	864.129	618.092	1149.63	1415.67	1657.05
12	0	0	649.39	1632.21	3234.98	2516.45	3574.14		12	737.452		1465.49	1365.79	1134.45	1111.53	1414.57		12	0	0	59.724	438.473	502.395	486.556	767.529
13	766.14	1049.25	0	733.025	2121.83	2048.78	2312.49		13	0	949.38	1453.19	940.983	1165.91	1152.53	1276.43		13	0	0	757.588	1296.02	1469.6	3126.26	2120.85
14	516.04	0	499.8	668.94	919.609	875.32	1450.35		14	1914.02		737.695	1182.95	2013.75	1521.92	1820.89		14	0	0	0	1136.46	1328.35	1026.81	1148.91
15	0	0	682.869	757.508	400	1226.91	1698.49		15	0		1515.4	1594.83	1420.54	1383.68	1417.59		15	0	0	558.026	1226.24	1882.18	2477.88	1585.27

## Sheet: Sheet1
Fixation Latency
	Peropheral Group									Central Group
	Lever 200									Lever 200
Sujeto	200	250	320	400	500	640	800		Sujeto	200	250	320	400	500	640	800
1									1
2									2
3									3
4									4
5									5
6									6
7									7
8									8
9									9
10									10
11									11
12									12
13									13
14									14
15									15
	Lever 800
Sujeto	200	250	320	400	500	640	800		Sujeto	200	250	320	400	500	640	800
1									1
2									2
3									3
4									4
5									5
6									6
7									7
8									8
9									9
10									10
11									11
12									12
13									13
14									14
15									15
Fixation Latency
	Peropheral Group									Central Group
	Lever 200									Lever 200
Sujeto	200	250	320	400	500	640	800		Sujeto	200	250	320	400	500	640	800
1									1
2									2
3									3
4									4
5									5
6									6
7									7
8									8
9									9
10									10
11									11
12									12
13									13
14									14
15									15
	Lever 800
Sujeto	200	250	320	400	500	640	800		Sujeto	200	250	320	400	500	640	800
1									1
2									2
3									3
4									4
5									5
6									6
7									7
8									8
9									9
10									10
11									11
12									12
13									13
14									14
15									15
